# Supplementary material for: The Short ITS2 Sequence Serves as an Efficient Taxonomic Sequence Tag in Comparison with the Full-Length ITS
Source: Biomed Res Int. 2013 Jan 17;2013:741476. doi: 10.1155/2013/741476 (PMC3581084; doi:10.1155/2013/741476)
Supplement: Supplementary file 1 — Table S1: List of 100 museum medicinal specimens and herbal products from the Buozhou herbal market and from specimens at the Institute of Medicinal Plant Development Table S2: List of GenBank accession numbers of 12861 ITS sequences Table S3: List of 603 genera that contain at least 3 samples [file 741476.f1.xls]

## Sheet: Table 1S
Table 1S. Samples used for PCR and sequencing analysis
Order	Species	Voucher number	Sample number	ITS accession number	ITS2 accession number
Angiosperm	Acanthopanax giraldii	PS1461MT01	TK781	-	GQ434776
Angiosperm	Akebia trifoliata subsp. trifoliata	PS0959MT01	TK724	-	GQ434615
Angiosperm	Alpinia galanga	PS0515MT05	TK901	-	GQ434441
Angiosperm	Alpinia zerumbet	PS0532MT01	TK700	-	GQ434449
Angiosperm	Amomum kravanh	PS0516MT01	TK908	-	GQ434442
Angiosperm	Amomum longiligulare	PS0522MT01	TK906	FJ980309	GQ434444
Angiosperm	Amomum villosum var. xanthioides	PS0526MT01	TK913	FJ980311	GQ434448
Angiosperm	Angelica sinensis	PS1205MT01	TK801	-	GQ434694
Angiosperm	Ardisia japonica	PS1659MT05	TK725	-	GQ434844
Angiosperm	Astragalus mongholicus	PS0277MT01	TK800	-	GQ434368
Angiosperm	Brassica juncea	PS1287MT01	TK664	FJ980406	GQ434719
Angiosperm	Brucea javanica	PS0753MT05	B43	-	GQ434552
Angiosperm	Chuanminshen violaceum	PS1202MT01	TK678	-	GQ434691
Angiosperm	Cimicifuga foetida	PS0925MT01	TK787	-	GQ434609
Angiosperm	Cimicifuga foetida	PS0925MT02	TK675	-	GQ434610
Angiosperm	Cistanche tubulosa	PS0811MT01	B47	-	GQ434562
Angiosperm	Citrus grandis	PS1600MT04	TK677	-	GQ434825
Angiosperm	Citrus grandis	PS1600MT05	TK904	-	GQ434826
Angiosperm	Citrus grandis var. tomentosa	PS1590MT02	TK903	-	GQ434818
Angiosperm	Citrus medica var. sarcodactylis	PS1595MT01	B15	FJ980436	GQ434821
Angiosperm	Citrus sinensis	PS1613MT01	TK814	-	GQ434833
Angiosperm	Clematis montana	PS0955MT01	TK671	-	GQ434613
Angiosperm	Cocculus orbiculatus	PS0353MT02	TK486	-	GQ434395
Angiosperm	Codonopsis tangshen	PS0580MT01	TK923	FJ980314	GQ434465
Angiosperm	Coptis deltoidea	PS0924MT01	TK681	-	GQ434608
Angiosperm	Cynanchum paniculatum	PS0836MT01	B42	-	GQ434572
Angiosperm	Cynomorium songaricum	PS1688MT01	TK1000	-	-
Angiosperm	Desmodium styracifolium	PS0232MT06	B18	FJ980290	GQ434356
Angiosperm	Dictamnus dasycarpus	PS1591MT02	B6	-	GQ434819
Angiosperm	Dimocarpus longan	PS1439MT01	TK221	FJ980419	GQ434768
Angiosperm	Epimedium acuminatum	PS1499MT01	TK680	FJ980426	GQ434789
Angiosperm	Epimedium acuminatum	PS1499MT02	TK665	FJ980427	GQ434790
Angiosperm	Epimedium pubescens	PS1505MT01	TK357	-	GQ434793
Angiosperm	Epimedium sagittatum	PS1502MT02	TK615	-	GQ434791
Angiosperm	Epimedium sagittatum	PS1502MT03	TK456	FJ980429	GQ434792
Angiosperm	Erodium stephanianum	PS0896MT02	TK620	-	GQ434598
Angiosperm	Ficus pumila	PS1229MT01	TK29	-	GQ434708
Angiosperm	Fraxinus chinensis	PS0962MT01	TK735	-	GQ434617
Angiosperm	Gardenia jasminoides var. grandiflora	PS1058MT01	TK463	-	-
Angiosperm	Gentiana macrophylla	PS0821MT02	TK792	-	GQ434565
Angiosperm	Gentiana manshurica	PS0823MT01	TK928	-	GQ434566
Angiosperm	Gentiana straminea	PS0820MT01	TK785	FJ980363	GQ434564
Angiosperm	Gynostemma pentaphyllum	PS0462MT02	TK534	-	GQ434426
Angiosperm	Gynostemma pentaphyllum	PS0462MT01	TK828	FJ980303	GQ434425
Angiosperm	Hedyotis diffusa	PS1034MT01	TK224	-	-
Angiosperm	Hedysarum polybotrys	PS0274MT01	TK799	-	GQ434367
Angiosperm	Helwingia japonica	PS1755MT01	TK660	-	GQ434854
Angiosperm	Helwingia japonica	PS1755MT02	TK686	-	GQ434855
Angiosperm	Ilex cornuta	PS0320MT01	TK472	-	GQ434382
Angiosperm	Ipomoea purpurea	PS1542MT01	TK354	-	GQ434807
Angiosperm	Juncus effusus	PS0218MT01	TK770	FJ980286	GQ434340
Angiosperm	Lepidium apetalum	PS1286MT01	TK757	FJ980405	GQ434718
Angiosperm	Ligusticum sinense	PS1208MT01	TK924	-	GQ434695
Angiosperm	Lindera aggregata	PS1630MT01	TK467	-	-
Angiosperm	Litsea cubeba	PS1623MT01	TK229	-	-
Angiosperm	Lonicera fulvotomentosa	PS1743MT01	TK693	-	GQ434851
Fern	Lycopodium japonicum	PS1298MT01	TK548	-	-
Angiosperm	Mahonia fortunei	PS1509MT01	TK765	FJ980428	GQ434795
Angiosperm	Melia toosendan	PS0777MT01	TK661	-	GQ434557
Angiosperm	Morinda officinalis	PS1033MT01	B2	-	GQ434633
Angiosperm	Murraya exotica	PS1605MT01	TK910	-	GQ434828
Angiosperm	Orostachys fimbriatus	PS1753MT01	TK818	-	GQ434853
Angiosperm	Oroxylum indicum	PS1669MT01	TK707	-	GQ434845
Angiosperm	Paeonia anomala	PS0906MT02	TK673	-	GQ434603
Angiosperm	Paeonia anomala	PS0906MT01	TK777	FJ980375	GQ434602
Angiosperm	Panax japonicus	PS1477MT01	TK683	-	GQ434780
Angiosperm	Petasites japonicus	PS0648MT01	TK358	FJ980332	GQ434501
Angiosperm	Phaseolus angularis	PS0279MT01	B8	FJ980293	GQ434369
Angiosperm	Phyllanthus emblica	PS0212MT01	TK921	-	GQ434335
Angiosperm	Picrasma quassioides	PS0751MT01	TK650	-	GQ434548
Angiosperm	Piper longum	PS0445MT01	TK911	FJ980300	GQ434421
Angiosperm	Podophyllum hexandrum	PS1507MT01	TK778	-	GQ434794
Fungi	Polyporus umbellatus	PS0338MT01	B46	-	GQ434389
Angiosperm	Prinsepia uniflora var. uniflora	PS1118MT01	TK804	-	GQ434658
Angiosperm	Pseudostellaria heterophylla	PS1320MT01	B36	-	GQ434732
Angiosperm	Quisqualis indica	PS1325MT01	B35	FJ980411	GQ434733
Angiosperm	Ranunculus ternatus	PS0934MT01	B28	-	GQ434612
Angiosperm	Rhodiola crenulata	PS0576MT01	TK773	-	GQ434463
Angiosperm	Rubus chingii	PS1135MT01	B22	-	GQ434662
Angiosperm	Sarcandra glabra	PS0548MT01	TK900	-	GQ434454
Angiosperm	Senecio scandens	PS0676MT06	TK929	FJ980344	GQ434520
Angiosperm	Siegesbeckia orientalis	PS0618MT01	TK223	-	GQ434483
Angiosperm	Smilax chinensis	PS0007MT01	TK509	-
Angiosperm	Solidago decurrens	PS0638MT01	TK230	-	GQ434497
Angiosperm	Stephania tetrandra	PS0348MT01	TK237	-
Angiosperm	Stephania tetrandra	PS0348MT02	TK487	-
Angiosperm	Strychnos nux-vomica	PS0891MT05	TK909	-	GQ434595
Angiosperm	Terminalia bellirica	PS1326MT01	TK914	-	GQ434734
Gymnosperm	Torreya grandis	PS1744MT01	TK927	-	GQ434852
Angiosperm	Tribulus terrester	PS0490MT04	B24	-	GQ434432
Angiosperm	Trigonella foenum-graecum	PS0319MT01	B20	FJ980296	GQ434381
Angiosperm	Tripterygium hypoglaucu	PS1428MT01	TK917	-	GQ434765
Angiosperm	Uncaria hirsuta	PS1043MT01	TK23	-	GQ434641
Angiosperm	Uncaria sinensis	PS1039MT01	TK723	-	GQ434639
Angiosperm	Verbena officinalis	PS0865MT03	TK769	-	GQ434586
Angiosperm	Viola diffusa	PS0555MT01	TK711	-	GQ434456
Angiosperm	Viscum liquidambaricolum	PS1227MT01	TK710	FJ980398	GQ434707
Angiosperm	Ziziphus jujuba var. spinosa	PS1339MT02	TK351	-	GQ434737
Angiosperm	Illicium verum	PS0005MT03	B1	-	GQ434311
Fern	Blechnum orientale	PS0374MT02	NN0214-1	-	GQ434402
Efficiency of PCR and sequencing				0.23	0.91

## Sheet: Table 2S
Abronia_ameliae_DQ317092.1
Abronia_angustifolia_DQ317093.1
Abronia_fragrans_AF212014.1
Abronia_fragrans_DQ317091.1
Abronia_fragrans_DQ317095.1
Abronia_macrocarpa_DQ317094.1
Abronia_umbellata_DQ317096.1
Abronia_villosa_DQ317097.1
Abrotanella_caespitosa_AY929881.1
Abrotanella_caespitosa_AY929882.1
Abrotanella_emarginata_AY929883.1
Abrotanella_fertilis_AY929884.1
Abrotanella_forsteroides_AY929885.1
Abrotanella_inconspicua_AY929886.1
Abrotanella_linearifolia_AY929887.1
Abrotanella_linearis_AY929888.1
Abrotanella_muscosa_AF422109.1
Abrotanella_nivigena_AY929889.1
Abrotanella_patearoa_AY929891.1
Abrotanella_patearoa_AY929892.1
Abrotanella_purpurea_AY929893.1
Abrotanella_pusilla_AY929894.1
Abrotanella_rostrata_AY929895.1
Abrotanella_rosulata_AY929896.1
Abrotanella_scapigera_AY929897.1
Abrotanella_spathulata_AY929898.1
Abrotanella_submarginata_AY929899.1
Abrotanella_trichoachaenia_AY929900.1
Abrotanella_trilobata_AY929901.1
Acacallis_cyanea_AY870104.1
Acacallis_fimbriata_AY870105.1
Acaena_anserinifolia_AY634778.1
Acaena_argentea_AY634782.1
Acaena_argentea_AY634784.1
Acaena_argentea_AY634785.1
Acaena_argentea_AY634787.1
Acaena_buchananii_EU352214.1
Acaena_caesiglauca_EU352215.1
Acaena_caesiiglauca_AY634788.1
Acaena_cylindristachya_AY634789.1
Acaena_cylindristachya_AY634790.1
Acaena_cylindristachya_AY634791.1
Acaena_cylindristachya_AY634792.1
Acaena_cylindristachya_AY634793.1
Acaena_digitata_AY634794.1
Acaena_digitata_AY634795.1
Acaena_digitata_AY634796.1
Acaena_digitata_AY634797.1
Acaena_digitata_AY634798.1
Acaena_digitata_AY634799.1
Acaena_elongata_AY634800.1
Acaena_elongata_AY634803.1
Acaena_elongata_AY634804.1
Acaena_eupatoria_AY634805.1
Acanthomintha_lanceolata_DQ667333.1
Acanthopale_laxiflora_EF214411.1
Acanthus_spinosus_AF169757.1
Acer_acuminatum_AY605370.1
Acer_acuminatum_AY605371.1
Acer_acuminatum_AY605372.1
Acer_albopurpurascens_DQ238471.1
Acer_albopurpurascens_DQ238472.1
Acer_barbinerve_AJ634569.1
Acer_buergerianum_AF020381.1
Acer_buergerianum_AY605464.1
Acer_buergerianum_AY605465.1
Acer_buergerianum_AY605466.1
Acer_campestre_AM265466.1
Acer_campestre_AM265467.1
Acer_campestre_AM265468.1
Acer_campestre_AM265469.1
Acer_campestre_AM265470.1
Acer_campestre_AM265471.1
Acer_campestre_AM265472.1
Acer_campestre_AM265473.1
Acer_campestre_AM265474.1
Acer_campestre_AM265475.1
Acer_campestre_AM265476.1
Acer_campestre_AM265477.1
Acer_campestre_AM265479.1
Acer_campestre_AM265480.1
Acer_campestre_AM265481.1
Acer_campestre_AM265482.1
Acer_campestre_AM265484.1
Acer_campestre_AM265485.1
Acer_campestre_AM265486.1
Acer_campestre_AM265487.1
Acer_campestre_AM265488.1
Acer_campestre_AM265489.1
Acer_campestre_AM265490.1
Acer_campestre_AM265491.1
Acer_campestre_AM265492.1
Acer_campestre_AM265493.1
Acer_campestre_AM265494.1
Acer_campestre_AM265495.1
Acer_campestre_AM265496.1
Acer_campestre_AM265497.1
Acer_campestre_AM265498.1
Acer_campestre_AM265499.1
Acer_campestre_AM265500.1
Acer_campestre_AM265501.1
Acer_campestre_AM265502.1
Acer_campestre_AM265503.1
Acer_campestre_AM265504.1
Acer_campestre_AM265505.1
Acer_campestre_AM265506.1
Acer_campestre_AM265508.1
Acer_campestre_AY605436.1
Acer_campestre_AY605437.1
Acer_campestre_AY605438.1
Acer_campestre_AY605439.1
Acer_campestre_AY605440.1
Acer_campestre_AY605441.1
Acer_campestre_AY605442.1
Acer_campestre_AY605443.1
Acer_campestre_DQ238420.1
Acer_campestre_DQ238421.1
Acer_campestre_DQ238423.1
Acer_campestre_DQ238424.1
Acer_campestre_DQ238425.1
Acer_campestre_DQ238427.1
Acer_campestre_DQ238428.1
Acer_campestre_DQ238429.1
Acer_campestre_DQ238430.1
Acer_campestre_DQ238431.1
Acer_campestre_DQ238432.1
Acer_campestre_DQ238434.1
Acer_campestre_DQ238435.1
Acer_capillipes_AY605389.1
Acer_capillipes_AY605390.1
Acer_capillipes_DQ238368.1
Acer_capillipes_DQ238369.1
Acer_capillipes_DQ238370.1
Acer_capillipes_DQ238371.1
Acer_cappadocicum_AY605445.1
Acer_carpinifolium_AY605377.1
Acer_carpinifolium_AY605378.1
Acer_carpinifolium_AY605379.1
Acer_carpinifolium_AY605380.1
Acer_carpinifolium_AY605381.1
Acer_cinnamomifolium_DQ238467.1
Acer_cinnamomifolium_DQ238468.1
Acer_cinnamomifolium_DQ238470.1
Acer_circinatum_AY605412.1
Acer_circinatum_AY605413.1
Acer_cissifolium_AY605401.1
Acer_cissifolium_AY605402.1
Acer_crataegifolium_AF020368.1
Acer_crataegifolium_AY605391.1
Acer_crataegifolium_DQ238375.1
Acer_crataegifolium_DQ238377.1
Acer_crataegifolium_DQ238378.1
Acer_crataegifolium_DQ238379.1
Acer_diabolicum_AF020366.1
Acer_diabolicum_AY605382.1
Acer_diabolicum_AY605383.1
Acer_diabolicum_AY605384.1
Acer_distylum_DQ238354.1
Acer_distylum_DQ238355.1
Acer_erianthum_AY605414.1
Acer_erianthum_AY605415.1
Acer_erianthum_AY605416.1
Acer_erianthum_DQ238391.1
Acer_glabrum_DQ238336.1
Acer_glabrum_DQ238337.1
Acer_glabrum_DQ238338.1
Acer_glabrum_DQ238339.1
Acer_glabrum_DQ238340.1
Acer_glabrum_DQ238341.1
Acer_glabrum_DQ238342.1
Acer_glabrum_DQ238343.1
Acer_grandidentatum_AY605297.1
Acer_grandidentatum_AY605298.1
Acer_grandidentatum_AY605300.1
Acer_griseum_AY605467.1
Acer_griseum_AY605468.1
Acer_griseum_AY605469.1
Acer_griseum_AY605470.1
Acer_griseum_AY605471.1
Acer_griseum_DQ238479.1
Acer_griseum_DQ238481.1
Acer_heldreichii_AM238280.1
Acer_heldreichii_AY605304.1
Acer_henryi_AJ634574.1
Acer_henryi_AY605403.1
Acer_henryi_AY605404.1
Acer_henryi_AY605405.1
Acer_ibericum_AM238352.1
Acer_ibericum_AM238353.1
Acer_ibericum_AY605307.1
Acer_ibericum_AY605308.1
Acer_ibericum_AY605309.1
Acer_ibericum_AY605310.1
Acer_ibericum_AY605311.1
Acer_ibericum_AY605312.1
Acer_ibericum_AY605313.1
Acer_ibericum_AY605314.1
Acer_japonicum_AY605420.1
Acer_japonicum_AY605421.1
Acer_japonicum_DQ238395.1
Acer_japonicum_DQ238396.1
Acer_japonicum_DQ238397.1
Acer_laevigatum_DQ238398.1
Acer_laurinum_AM113541.1
Acer_laurinum_AM113543.1
Acer_laurinum_DQ366114.1
Acer_macrophyllum_AY605385.1
Acer_macrophyllum_AY605386.1
Acer_macrophyllum_AY605387.1
Acer_macrophyllum_AY605388.1
Acer_macrophyllum_DQ238347.1
Acer_macrophyllum_DQ238348.1
Acer_macrophyllum_DQ238349.1
Acer_macrophyllum_DQ238350.1
Acer_macrophyllum_DQ238351.1
Acer_macrophyllum_DQ238352.1
Acer_macrophyllum_DQ238353.1
Acer_mandshuricum_DQ238473.1
Acer_mandshuricum_DQ238474.1
Acer_mandshuricum_DQ238475.1
Acer_mandshuricum_DQ238476.1
Acer_maximowiczianum_AJ698721.1
Acer_maximowiczianum_AJ698722.1
Acer_maximowiczianum_DQ238482.1
Acer_maximowiczianum_DQ238483.1
Acer_maximowiczianum_DQ238484.1
Acer_maximowiczianum_DQ238485.1
Acer_maximowiczianum_DQ238486.1
Acer_maximowiczianum_DQ238487.1
Acer_micranthum_AF020369.1
Acer_miyabei_AY605451.1
Acer_miyabei_AY605452.1
Acer_mono_AF020383.1
Acer_mono_AY605446.1
Acer_mono_AY605447.1
Acer_mono_AY605448.1
Acer_mono_AY605449.1
Acer_mono_AY605450.1
Acer_negundo_AY605406.1
Acer_negundo_AY605407.1
Acer_negundo_AY605408.1
Acer_negundo_AY605409.1
Acer_negundo_DQ238358.1
Acer_negundo_DQ238359.1
Acer_negundo_DQ238360.1
Acer_negundo_DQ238361.1
Acer_negundo_DQ238362.1
Acer_nigrum_AM238326.1
Acer_nigrum_AY605322.1
Acer_nigrum_AY605323.1
Acer_nigrum_AY605324.1
Acer_nipponicum_AF020380.1
Acer_nipponicum_DQ366140.1
Acer_nipponicum_DQ366142.1
Acer_obtusifolium_AM238328.1
Acer_obtusifolium_AM238329.1
Acer_obtusifolium_AM238330.1
Acer_obtusifolium_AM238331.1
Acer_obtusifolium_AM238332.1
Acer_obtusifolium_AM238333.1
Acer_pensylvanicum_AY605398.1
Acer_pentaphyllum_DQ238477.1
Acer_pentaphyllum_DQ238478.1
Acer_pilosum_DQ238345.1
Acer_platanoides_AF020384.1
Acer_platanoides_AY605453.1
Acer_platanoides_AY605454.1
Acer_platanoides_AY605455.1
Acer_platanoides_AY605456.1
Acer_platanoides_AY605457.1
Acer_platanoides_DQ238458.1
Acer_platanoides_DQ238460.1
Acer_platanoides_DQ238461.1
Acer_pseudoplatanus_AM238251.1
Acer_pseudoplatanus_AM238254.1
Acer_pseudoplatanus_AM238255.1
Acer_pseudoplatanus_AM238256.1
Acer_pseudoplatanus_AM238257.1
Acer_pseudoplatanus_AM238258.1
Acer_pseudoplatanus_AM238261.1
Acer_pseudoplatanus_AM238263.1
Acer_pseudoplatanus_AM238265.1
Acer_pseudoplatanus_AM238266.1
Acer_pseudoplatanus_AM238267.1
Acer_pseudoplatanus_AM238269.1
Acer_pseudoplatanus_AM238272.1
Acer_pseudoplatanus_AM238273.1
Acer_pseudoplatanus_AY605338.1
Acer_pseudoplatanus_AY605339.1
Acer_pseudoplatanus_AY605340.1
Acer_pseudoplatanus_AY605341.1
Acer_pseudoplatanus_AY605342.1
Acer_pseudoplatanus_AY605343.1
Acer_pseudoplatanus_DQ366131.1
Acer_pseudoplatanus_DQ366132.1
Acer_pseudoplatanus_DQ366133.1
Acer_pycnanthum_AM113528.1
Acer_pycnanthum_AM113529.1
Acer_rubrum_AF020385.1
Acer_rubrum_AJ634580.1
Acer_rubrum_AJ634585.1
Acer_rubrum_AJ634586.1
Acer_rubrum_AY605460.1
Acer_rubrum_AY605461.1
Acer_rufinerve_AF020371.1
Acer_rufinerve_AY605399.1
Acer_rufinerve_AY605400.1
Acer_rufinerve_DQ238372.1
Acer_rufinerve_DQ238373.1
Acer_rufinerve_DQ238374.1
Acer_saccharinum_AM113531.1
Acer_saccharinum_AM113532.1
Acer_saccharinum_AM113533.1
Acer_saccharinum_AM113534.1
Acer_saccharinum_AM113535.1
Acer_saccharinum_AM113536.1
Acer_saccharinum_AM113537.1
Acer_saccharinum_AM113538.1
Acer_saccharinum_AM113539.1
Acer_saccharinum_AM113540.1
Acer_saccharinum_AY605462.1
Acer_saccharinum_AY605463.1
Acer_saccharum_AF020363.1
Acer_sempervirens_AM238335.1
Acer_sempervirens_AM238338.1
Acer_sempervirens_AM238340.1
Acer_sempervirens_AM238341.1
Acer_sempervirens_AM238342.1
Acer_sempervirens_AM238343.1
Acer_sempervirens_AM238344.1
Acer_sempervirens_AM238345.1
Acer_sempervirens_AM238350.1
Acer_sempervirens_AM238351.1
Acer_sempervirens_AY605349.1
Acer_sempervirens_AY605350.1
Acer_sempervirens_AY605351.1
Acer_sempervirens_AY605352.1
Acer_sempervirens_AY605353.1
Acer_sempervirens_DQ366122.1
Acer_sempervirens_DQ366123.1
Acer_shirasawanum_AY605427.1
Acer_shirasawanum_AY605428.1
Acer_shirasawanum_DQ238409.1
Acer_shirasawanum_DQ238411.1
Acer_shirasawanum_DQ238412.1
Acer_spicatum_AJ634575.1
Acer_spicatum_AJ634576.1
Acer_spicatum_AJ634577.1
Acer_spicatum_AJ634578.1
Acer_spicatum_AY605431.1
Acer_tataricum_AF020364.1
Acer_tataricum_AM265510.1
Acer_tataricum_AM265511.1
Acer_tataricum_AM265512.1
Acer_tataricum_AM265513.1
Acer_tegmentosum_DQ366113.1
Acer_trautvetteri_AM238281.1
Acer_trautvetteri_AM238282.1
Acer_trautvetteri_AM238283.1
Acer_trautvetteri_AM238285.1
Acer_trautvetteri_AY605354.1
Acer_trautvetteri_AY605355.1
Acer_triflorum_AY605472.1
Acer_truncatum_AY605458.1
Acer_truncatum_AY605459.1
Acer_tschonoskii_AF020372.1
Acer_velutinum_AM238286.1
Acer_velutinum_AM238288.1
Acer_velutinum_AM238289.1
Acer_velutinum_AM238290.1
Acer_velutinum_AM238291.1
Acer_velutinum_AM238292.1
Acer_velutinum_AM238293.1
Acer_velutinum_AM238294.1
Acer_velutinum_AY605356.1
Acer_velutinum_AY605357.1
Acer_velutinum_AY605358.1
Acer_velutinum_AY605359.1
Acer_velutinum_AY605360.1
Acer_velutinum_AY605362.1
Acer_velutinum_DQ366135.1
Acer_velutinum_DQ366136.1
Acer_wardii_DQ238413.1
Achillea_wilsoniana_EF577285.1
Achillea_wilsoniana_FJ980357.1
Achillea_wilsoniana_FJ980358.1
Achyranthes_bidentata_DQ813300.1
Aciachne_acicularis_FJ461260.1
Acicarpha_tribuloides_EU841173.1
Acicarpha_tribuloides_EU841174.1
Acidonia_microcarpa_EU676080.1
Acidosasa_gigantea_GQ464804.1
Aciotis_fragilis_AY460428.1
Aciphylla_aurea_U72377.1
Aciphylla_dieffenbachii_U72381.1
Aciphylla_monroi_U72378.1
Aciphylla_squarrosa_U72379.1
Acleisanthes_anisophylla_AF211986.1
Acleisanthes_chenopodioides_DQ317089.1
Acleisanthes_crassifolia_AF211987.1
Acleisanthes_longiflora_DQ317090.1
Acleisanthes_nana_AF211990.1
Acleisanthes_obtusa_AF211984.1
Acleisanthes_wrightii_AF211989.1
Acnistus_arborescens_DQ314173.1
Acnistus_arborescens_DQ314181.1
Acnistus_arborescens_DQ314183.1
Acorus_americanus_DQ008850.1
Acorus_calamus_DQ008848.1
Acorus_calamus_DQ008852.1
Acorus_gramineus_DQ008846.1
Acorus_gramineus_DQ008849.1
Acorus_latifolius_DQ008843.1
Acorus_macrospadiceus_DQ008842.1
Acorus_tatarinowii_DQ008844.1
Acorus_tatarinowii_DQ008845.1
Acorus_tatarinowii_DQ008851.1
Acorus_xiangyeus_DQ008841.1
Acridocarpus_adenophorus_AY137291.1
Acridocarpus_adenophorus_AY137315.1
Acridocarpus_alopecurus_AY137319.1
Acridocarpus_alopecurus_AY137320.1
Acridocarpus_alopecurus_AY137321.1
Acridocarpus_alopecurus_AY137322.1
Acridocarpus_alternifolius_AY137292.1
Acridocarpus_alternifolius_AY137329.1
Acridocarpus_alternifolius_AY137330.1
Acridocarpus_alternifolius_AY137331.1
Acridocarpus_austrocaledonicus_AY137293.1
Acridocarpus_austrocaledonicus_AY137316.1
Acridocarpus_austrocaledonicus_AY137317.1
Acridocarpus_austrocaledonicus_AY137318.1
Acridocarpus_ballyi_AY137294.1
Acridocarpus_chevalieri_AY137295.1
Acridocarpus_chevalieri_AY137333.1
Acridocarpus_chevalieri_AY137334.1
Acridocarpus_chevalieri_AY137335.1
Acridocarpus_chevalieri_AY137336.1
Acridocarpus_excelsus_AY137296.1
Acridocarpus_longifolius_AY137297.1
Acridocarpus_macrocalyx_AY137299.1
Acridocarpus_macrocalyx_AY137300.1
Acridocarpus_macrocalyx_AY137305.1
Acridocarpus_natalitius_AY137302.1
Acridocarpus_orientalis_AY137303.1
Acridocarpus_plagiopterus_AY137301.1
Acridocarpus_plagiopterus_AY137304.1
Acridocarpus_smeathmannii_AY137306.1
Acridocarpus_smeathmannii_AY137307.1
Acridocarpus_smeathmannii_AY137308.1
Acridocarpus_smeathmannii_AY137309.1
Acridocarpus_smeathmannii_AY137310.1
Acridocarpus_smeathmannii_AY137326.1
Acridocarpus_smeathmannii_AY137327.1
Acridocarpus_smeathmannii_AY137328.1
Acridocarpus_staudtii_AY137311.1
Acridocarpus_zanzibaricus_AY137312.1
Acridocarpus_zanzibaricus_AY137323.1
Acridocarpus_zanzibaricus_AY137324.1
Acrisione_cymosa_EF538144.1
Acrorchis_roseola_AY174761.1
Actaea_racemosa_GQ409509.1
Actaea_racemosa_GQ409510.1
Actaea_racemosa_GQ409511.1
Actinocheita_filicina_AY641509.1
Ada_elegantula_FJ565503.1
Ada_ocanensis_FJ565605.1
Ada_pozoi_FJ565549.1
Adelobotrys_adscendens_AY460446.1
Adelobotrys_panamensis_EU055643.1
Adenia_aculeata_DQ521302.1
Adenia_acuta_DQ521328.1
Adenia_ballyi_DQ521316.1
Adenia_boivinii_DQ521346.1
Adenia_cissampeloides_DQ521370.1
Adenia_cladosepala_DQ521331.1
Adenia_cordifolia_DQ521298.1
Adenia_densiflora_DQ521333.1
Adenia_digitata_DQ521361.1
Adenia_digitata_DQ521363.1
Adenia_elegans_DQ521332.1
Adenia_ellenbeckii_DQ521304.1
Adenia_fasciculata_DQ521329.1
Adenia_goetzei_DQ521355.1
Adenia_gummifera_DQ521371.1
Adenia_hondala_AY632699.1
Adenia_isaloensis_DQ521325.1
Adenia_kirkii_DQ521358.1
Adenia_kirkii_DQ521359.1
Adenia_lapiazicola_DQ521341.1
Adenia_lindiensis_DQ521368.1
Adenia_lobata_DQ521351.1
Adenia_longestipitata_DQ521327.1
Adenia_mannii_DQ521353.1
Adenia_monadelpha_DQ521344.1
Adenia_pachyphylla_DQ521330.1
Adenia_peltata_DQ521347.1
Adenia_pulchra_DQ521366.1
Adenia_pyromorpha_DQ521326.1
Adenia_refracta_DQ521345.1
Adenia_repanda_DQ521354.1
Adenia_schliebenii_DQ521306.1
Adenia_sphaerocarpa_DQ521339.1
Adenia_spinosa_DQ521349.1
Adenia_stricta_DQ521307.1
Adenia_subsessilifolia_DQ521334.1
Adenia_trisecta_DQ521357.1
Adenia_volkensii_DQ521305.1
Adenia_wilmsii_DQ521362.1
Adenophora_remotiflora_AY548197.1
Adenophora_trachelioides_AY548196.1
Adenophora_triphylla_AY548194.1
Adonis_vernalis_AJ347910.1
Aeginetia_indica_AY596819.1
Aegle_marmelos_FJ434169.1
Aeonium_castello-paivae_AY082127.1
Aeonium_davidbramwellii_AY082129.1
Aeonium_gomerense_AY082133.1
Aeonium_nobile_AY082144.1
Aeonium_percarneum_AY082146.1
Aeonium_spathulatum_AY082149.1
Aeonium_tabuliforme_AY082126.1
Aeonium_viscatum_AY082154.1
Aerangis_articulata_EF079444.1
Aerides_crassifolia_EF670350.1
Aerides_crispa_EF670351.1
Aerides_emericii_EF670320.1
Aerides_flabellata_EF670368.1
Aerides_flabellata_EF670369.1
Aerides_flabellata_EF670370.1
Aerides_flabellata_EF670371.1
Aerides_inflexa_EF670322.1
Aerides_krabiensis_EF670341.1
Aerides_lawrenciae_EF670328.1
Aerides_leeana_EF670323.1
Aerides_leeana_EF670324.1
Aerides_leeana_EF670325.1
Aerides_leeana_EF670327.1
Aerides_multiflora_EF670342.1
Aerides_multiflora_EF670343.1
Aerides_multiflora_EF670345.1
Aerides_multiflora_EF670348.1
Aerides_multiflora_EF670349.1
Aerides_odorata_var._bicuspidata_EF670334.1
Aerides_quinquevulnera_EF670335.1
Aerides_ringens_EF670353.1
Aerides_rosea_EF670340.1
Aerides_rubescens_EF670354.1
Aerides_sukauensis_EF670355.1
Aerides_thibautiana_EF670336.1
Aerides_thibautiana_EF670337.1
Aetheolaena_campanulata_EF538149.1
Aetheolaena_involucrata_EF538150.1
Aetheorhyncha_andreettae_AY870031.1
Aethionema_arabicum_AY254539.1
Aethionema_grandiflorum_AM905710.1
Aethionema_grandiflorum_AM905711.1
Afraegle_paniculata_FJ434170.1
Agalinis_acuta_EU827810.1
Agalinis_acuta_EU827814.1
Agalinis_acuta_EU827818.1
Agalinis_auriculata_EU827821.1
Agalinis_auriculata_EU827822.1
Agalinis_divaricata_EU827827.1
Agalinis_divaricata_EU827828.1
Agalinis_edwardsiana_EU827829.1
Agalinis_fasciculata_EU827830.1
Agalinis_fasciculata_EU827831.1
Agalinis_fasciculata_EU827832.1
Agalinis_gattingeri_EU827823.1
Agalinis_laxa_EU827842.1
Agalinis_maritima_EU827824.1
Agalinis_maritima_EU827846.1
Agalinis_plukenetii_EU827855.1
Agalinis_plukenetii_EU827856.1
Agalinis_pulchella_EU827857.1
Agalinis_purpurea_EU827858.1
Agalinis_purpurea_EU827859.1
Agalinis_purpurea_EU827860.1
Agalinis_purpurea_EU827861.1
Agalinis_setacea_EU827862.1
Agalinis_skinneriana_EU827864.1
Agalinis_skinneriana_EU827865.1
Agalinis_tenuifolia_EU827875.1
Aganisia_pulchella_AY870106.1
Agastache_barberi_AJ421001.1
Agastache_cana_AJ421000.1
Agastache_urticifolia_DQ667247.1
Agathisanthemum_bojeri_AM939424.1
Agathisanthemum_globosum_AM939425.1
Ageratina_adenophora_AY576867.1
Ageratina_riparia_AY576865.1
Ageratum_conyzoides_FJ980330.1
Aglaia_archboldiana_AY695524.1
Aglaia_argentea_AY695525.1
Aglaia_argentea_AY695526.1
Aglaia_basiphylla_AY695527.1
Aglaia_coriacea_AY695529.1
Aglaia_coriacea_EF491263.1
Aglaia_edulis_AY695533.1
Aglaia_elaeagnoidea_AY695536.1
Aglaia_eximia_AY695541.1
Aglaia_forbesii_AY695546.1
Aglaia_grandis_AY695548.1
Aglaia_korthalsii_AY695549.1
Aglaia_korthalsii_EF491264.1
Aglaia_lawii_AY695573.1
Aglaia_lawii_AY695574.1
Aglaia_lawii_AY695575.1
Aglaia_odorata_AY695551.1
Aglaia_odoratissima_AY695553.1
Aglaia_oligophylla_AY695554.1
Aglaia_pachyphylla_AY695555.1
Aglaia_sapindina_AY695558.1
Aglaia_simplicifolia_AY695560.1
Aglaia_teysmanniana_AY695537.1
Aglaia_teysmanniana_AY695539.1
Aglaia_teysmanniana_AY695581.1
Aglaia_tomentosa_AY695565.1
Aglaia_tomentosa_AY695566.1
Aglaia_tomentosa_AY695567.1
Agoseris_heterophylla_L13954.1
Agropyron_cristatum_AY740890.1
Agropyron_cristatum_AY740891.1
Agropyron_cristatum_AY740892.1
Agrostis_gigantea_EF565133.1
Agrostis_imbecilla_AY705885.1
Agrostis_magellanica_AY705883.1
Agrostis_muelleriana_AY705880.1
Agrostis_muscosa_AY705884.1
Agrostis_pallescens_AY705879.1
Agrostis_personata_AY705881.1
Agrostis_petriei_AY705882.1
Aichryson_pachycaulon_AY082105.1
Aichryson_palmense_AY082104.1
Aichryson_porphyrogennetos_AY082106.1
Aichryson_punctatum_AY082103.1
Aizopsis_litoralis_AM039909.1
Ajania_breviloba_EF577271.1
Ajania_fastigiata_EF577272.1
Ajania_fruticulosa_EF577273.1
Ajania_khartensis_EF577274.1
Ajania_myriantha_EF577275.1
Ajania_nematoloba_EF577276.1
Ajania_pacifica_EF577277.1
Ajania_potaninii_EF577278.1
Ajania_remotipinna_EF577280.1
Ajania_shiwogiku_EF577282.1
Ajania_variifolia_EF577283.1
Alberta_magna_FM204677.1
Alberta_minor_FM204678.1
Alberta_minor_FM204680.1
Alberta_minor_FM204681.1
Alberta_sambiranensis_FM204684.1
Alberta_sambiranensis_FM204685.1
Alcea_angulata_EF419543.1
Alcea_arbelensis_EF679716.1
Alcea_aucheri_EF679717.1
Alcea_excubita_EF679718.1
Alcea_flavovirens_EF679719.1
Alcea_glabrata_EF679721.1
Alcea_gorganica_EF679720.1
Alcea_koelzii_EF679722.1
Alcea_kurdica_EF679723.1
Alcea_longipedicellata_EF679724.1
Alcea_pallida_EF419545.1
Alcea_pallida_EF679715.1
Alcea_rechingeri_EF679725.1
Alcea_rosea_EF419544.1
Alcea_rosea_EF679714.1
Alcea_sachsachanica_EF679726.1
Alcea_schirazana_EF679728.1
Alcea_setosa_EF679727.1
Alcea_sulphurea_EF679729.1
Alcea_tabrisiana_EF679730.1
Alcea_wilhelminae_EF679731.1
Alisma_gramineum_DQ468391.1
Alisma_lanceolatum_DQ468390.1
Alisma_nanum_DQ468389.1
Alisma_orientale_AY519469.1
Alisma_plantago-aquatica_AY588940.1
Allanblackia_floribunda_EU128370.1
Allanblackia_floribunda_EU128371.1
Allionia_incarnata_AF212012.1
Allionia_incarnata_DQ317079.1
Allium_macrostemon_GQ412213.1
Allium_tuberosum_FJ980277.1
Alloxylon_flammeum_EU676083.1
Alopecurus_borealis_EU792345.1
Alopecurus_gerardii_EU792344.1
Aloysia_virgata_FJ867398.1
Alseuosmia_macrophylla_EU331126.1
Alseuosmia_pusilla_EU331127.1
Alseuosmia_quercifolia_EU331128.1
Alseuosmia_quercifolia_EU331129.1
Alseuosmia_quercifolia_EU331131.1
Alseuosmia_turneri_EU331130.1
Alstonia_scholaris_FJ980306.1
Alternanthera_denticulata_EU497241.1
Alternanthera_laguroides_EU567664.1
Alternanthera_sessilis_EU497240.1
Althaea_armeniaca_EF679734.1
Althaea_cannabina_EF419539.1
Althaea_cannabina_EF419540.1
Althaea_cannabina_EF419541.1
Althaea_hirsuta_EF419507.1
Althaea_hirsuta_EF419508.1
Althaea_hirsuta_EF419509.1
Althaea_hirsuta_EF419510.1
Althaea_longiflora_EF419500.1
Althaea_longiflora_EF419501.1
Althaea_longiflora_EF419502.1
Althaea_longiflora_EF419503.1
Althaea_ludwigii_EF419504.1
Althaea_ludwigii_EF419505.1
Althaea_ludwigii_EF419506.1
Althaea_officinalis_EF419536.1
Althaea_officinalis_EF419537.1
Althaea_officinalis_EF419538.1
Althaea_officinalis_EF679733.1
Alyssum_montanum_AM905712.1
Alyssum_montanum_AM905713.1
Alyssum_montanum_AM905714.1
Amana_erythronioides_EU912095.1
Amburana_cearensis_DQ787386.1
Amesiella_philippinensis_EF079433.1
Ammannia_baccifera_FM887010.1
Ammocharis_nerinoides_AY139116.1
Amphiasma_benguellense_AM939426.1
Amphiasma_luzuloides_AM939427.1
Amphiasma_luzuloides_AM939428.1
Anaectocalyx_bracteosa_AY460460.1
Anaectocalyx_manarae_AY460461.1
Anaphalis_nepalensis_EF107657.1
Anatherostipa_brevis_FJ461261.1
Ancistrorhynchus_cephalotes_EF670388.1
Ancistrorhynchus_paysanii_EF079443.1
Andrachne_aspera_AY936648.1
Andryala_integrifolia_AY879153.1
Anethum_graveolens_AY548225.1
Angelica_acutiloba_AY548227.1
Angelica_dahurica_FJ980394.1
Angelica_decursiva_AY548220.1
Angelica_decursiva_DQ132872.1
Angelica_japonica_AY548214.1
Angelica_purpureifolia_AY548229.1
Angelica_sinensis_FJ572042.1
Angelica_tenuissima_AY548215.1
Angkalanthus_oligophylla_EU087478.1
Angraecum_aporoides_EF079445.1
Anguloa_ruckeri_EF079426.1
Anisacanthus_thurberi_AF169846.1
Aniselytron_treutleri_EU792373.1
Anisophyllea_cinnamomoides_AY973443.1
Anisophyllea_corneri_AY973444.1
Anisophyllea_disticha_AY973445.1
Anisophyllea_fallax_AY973446.1
Anisophyllea_manausensis_AY973447.1
Anisophyllea_meniaudi_AY973448.1
Anisophyllea_myriosticta_AY973454.1
Anisophyllea_polyneura_AY973450.1
Anisophyllea_purpurascens_AY973452.1
Anisophyllea_sororia_AY973453.1
Anisotome_aromatica_U72374.1
Anisotome_filifolia_U72375.1
Anoectochilus_formosanus_GQ328777.1
Anoectochilus_formosanus_GQ396668.1
Anthocercis_gracilis_AJ492457.1
Anthonotha_gabunensis_AF513652.1
Anthonotha_macrophylla_AF513653.1
Anthosiphon_roseans_DQ210416.1
Anthotroche_pannosa_AJ492458.1
Anthoxanthum_alpinum_EU093027.1
Anthoxanthum_monticola_EF577511.1
Anthoxanthum_odoratum_FJ010630.1
Antiaris_toxicaria_FJ980399.1
Anulocaulis_eriosolenus_DQ317086.1
Anulocaulis_leiosolenus_DQ317087.1
Apalanthe_granatensis_AY870362.1
Apera_interrupta_EU792364.1
Aphanelytrum_peruvianum_EU792421.1
Aphanelytrum_procumbens_EU792419.1
Aphanelytrum_procumbens_EU792423.1
Aphanocalyx_djumaensis_AF513656.1
Aphanocalyx_ledermannii_AF513659.1
Aphanocalyx_ledermannii_AF513660.1
Aphanocalyx_margininervatus_AF513661.1
Aphanocalyx_obscurus_AF513666.1
Aphanocalyx_pectinatus_AF513667.1
Aphelandra_fernandezii_DQ028455.1
Aphelandra_hylaea_DQ028452.1
Aphelandra_impressa_DQ028453.1
Aphelandra_lasia_DQ028457.1
Aphelandra_rubra_DQ028448.1
Aphelandra_tetragona_DQ028458.1
Aphelandra_tonduzii_DQ028445.1
Aphelandra_tridentata_DQ028463.1
Aphelandra_verticillata_DQ028436.1
Aphyllorchis_caudata_FJ454866.1
Apinagia_yguazuensis_DQ397951.1
Aponogeton_bullosus_AY926318.1
Aponogeton_crispus_AY926288.1
Aponogeton_distachyus_AY926320.1
Aponogeton_elongatus_AY926294.1
Aponogeton_elongatus_AY926295.1
Aponogeton_elongatus_AY926296.1
Aponogeton_elongatus_AY926297.1
Aponogeton_euryspermus_AY926308.1
Aponogeton_kimberleyensis_AY926309.1
Aponogeton_lancesmithii_AY926316.1
Aponogeton_longiplumulosus_AY335956.1
Aponogeton_longiplumulosus_AY926284.1
Aponogeton_madagascariensis_AY926285.1
Aponogeton_madagascariensis_AY926286.1
Aponogeton_proliferus_AY926315.1
Aponogeton_queenslandicus_AY926293.1
Aponogeton_queenslandicus_AY926298.1
Aponogeton_rigidifolius_AY335957.1
Aponogeton_rigidifolius_AY926287.1
Aponogeton_stachyosporus_AY926303.1
Aponogeton_stachyosporus_AY926304.1
Aponogeton_stachyosporus_AY926305.1
Aponogeton_stachyosporus_AY926306.1
Aponogeton_ulvaceus_AY926283.1
Aponogeton_ulvaceus_AY926307.1
Aponogeton_ulvaceus_AY926312.1
Aponogeton_ulvaceus_AY926313.1
Aponogeton_undulatus_AY926302.1
Aponogeton_vanbruggenii_AY926299.1
Aponogeton_vanbruggenii_AY926300.1
Aponogeton_vanbruggenii_AY926314.1
Aposeris_foetida_DQ451822.1
Apostasia_odorata_AY557229.1
Apostasia_wallichii_AY557228.1
Apterosperma_oblata_AY070324.1
Aquilaria_sinensis_EF645833.1
Aquilaria_sinensis_EF645834.1
Aquilaria_sinensis_EF645836.1
Aquilaria_sinensis_FJ980392.1
Aquilaria_sinensis_GQ891956.1
Aquilaria_yunnanensis_EF645835.1
Arabidopsis_lyrata_DQ310522.1
Arabidopsis_thaliana_X52320.1
Arabis_glabra_DQ310526.1
Arabis_gunnisoniana_AY254540.1
Arachis_hypogaea_FJ212319.1
Arachnis_flos-aeris_EF079431.1
Arachnothryx_chimboracensis_AY730292.1
Arachnothryx_leucophylla_AY730296.1
Aragoa_abietina_AJ459404.1
Aragoa_corrugatifolia_AJ548980.1
Aragoa_cundinamarcensis_AJ459403.1
Aragoa_cupressina_AJ459402.1
Aralia_armata_AY233310.1
Aralia_bipinnata_DQ007354.1
Aralia_chinensis_U63181.1
Aralia_dasyphylla_DQ007355.1
Aralia_foliolosa_AY233312.1
Aralia_franchetii_AY271909.1
Aralia_gigantea_AY233313.1
Aralia_gigantea_AY233314.1
Aralia_hiepiana_AY233316.1
Aralia_leschenaultii_AY233317.1
Aralia_lihengiana_AY233315.1
Aralia_parasitica_AY233319.1
Aralia_subcordata_DQ007357.1
Aralia_thomsonii_DQ007358.1
Archontophoenix_cunninghamiana_GQ892876.1
Arctagrostis_latifolia_AY237843.1
Arctagrostis_latifolia_EU792351.1
Arctagrostis_latifolia_EU792352.1
Arctagrostis_latifolia_EU792353.1
Arctagrostis_latifolia_EU921830.1
Arctanthemum_arcticum_EF577286.1
Arctium_lappa_FJ528300.1
Arctophila_fulva_AY237831.1
Arctophila_fulva_AY237832.1
Arctophila_fulva_EU792347.1
Arctopoa_schischkinii_EU935583.1
Arctopoa_subfastigiata_EU792371.1
Arctopoa_subfastigiata_EU792372.1
Arctopoa_tibetica_EU792368.1
Arctopoa_tibetica_EU792370.1
Arctopus_dregei_AM158942.1
Arctopus_echinatus_AM158943.1
Arctopus_monacanthus_AM158944.1
Arcytophyllum_muticum_AM939429.1
Arcytophyllum_rivetii_AM939430.1
Arcytophyllum_thymifolium_AM939431.1
Ardisia_quinquegona_FJ980441.1
Argania_spinosa_AM408056.1
Argyranthemum_frutescens_EF577287.1
Argyrotegium_fordianum_AY554105.1
Arisaema_amurense_var._serratum_FJ980445.1
Arnica_cordifolia_EF104922.1
Arnoglossum_atriplicifolium_EF538154.1
Arrhenechthites_mixta_EF538156.1
Artemisia_abrotanum_EF577288.1
Artemisia_absinthium_EF577289.1
Artemisia_annua_AY548199.1
Artemisia_annua_FJ528301.1
Artemisia_annua_FJ980327.1
Artemisia_annua_FJ980328.1
Artemisia_apiacea_AY548198.1
Artemisia_argyi_FJ528302.1
Artemisia_argyi_GQ396673.1
Artemisia_capillaris_AY548201.1
Artemisia_gmelinii_FJ980317.1
Artemisia_indica_EF107651.1
Artemisia_iwayomogi_AY548202.1
Artemisia_japonica_AY548200.1
Artemisia_lavandulifolia_FJ980353.1
Artemisia_sericea_EF577290.1
Arthrophyllum_ahernianum_DQ007359.1
Arthrophyllum_angustatum_U63182.1
Arthrophyllum_ovalifolium_DQ007360.1
Arthrostema_ciliatum_AY460429.1
Artorima_erubescens_EF079374.1
Ascocentropsis_pusilla_EF079438.1
Ascocentrum_ampullaceum_EF079434.1
Ascocentrum_curvifolium_EF670356.1
Aspalathus_acutiflora_EU347735.1
Aspalathus_confusa_EU347736.1
Aspalathus_crenata_EU347729.1
Aspalathus_galeata_EU347726.1
Aspalathus_hystrix_EU347734.1
Aspalathus_linearis_EU347722.1
Aspalathus_macrantha_EU347728.1
Aspalathus_pachyloba_EU347733.1
Aspalathus_willdenowiana_EU347730.1
Aspasia_lunata_EF079406.1
Aspasia_lunata_FJ565252.1
Aspasia_principissa_FJ565440.1
Aspasia_silvana_FJ565299.1
Aspidopterys_elliptica_AF436780.1
Aspidopterys_obcordata_FJ980312.1
Aster_glehnii_AY722010.1
Aster_indicus_EF108396.1
Aster_tataricus_FJ539125.1
Aster_tataricus_FJ980359.1
Astraea_lobata_EU586945.1
Astragalus_chinensis_FJ980292.1
Astragalus_membranaceus_FJ572044.1
Astragalus_yatungensis_AF521955.1
Astrebla_lappacea_DQ888634.1
Astrocasia_jacobinensis_DQ787412.1
Astrocasia_neurocarpa_AY936649.1
Astrotrichilia_asterotricha_FJ518866.1
Asystasia_gangetica_GQ465765.1
Ataenidia_conferta_AY673044.1
Athanasia_pachycephala_AM774447.1
Atocion_armeria_FJ384026.1
Atocion_armeria_FJ384027.1
Atocion_compactum_FJ384030.1
Atocion_compactum_FJ384031.1
Atocion_compactum_FJ384032.1
Atocion_lerchenfeldianum_FJ384033.1
Atocion_rupestre_FJ384037.1
Atocion_rupestre_FJ384039.1
Atocion_rupestre_FJ384040.1
Atocion_rupestris_AY594310.1
Atractylodes_chinensis_AY548205.1
Atractylodes_japonica_AY548203.1
Atractylodes_lancea_DQ159944.1
Atractylodes_macrocephala_AY548206.1
Atriplex_amnicola_AM420668.1
Atriplex_amnicola_AM420670.1
Atriplex_amnicola_AM420671.1
Atriplex_australasica_EU331095.1
Atriplex_billardierei_EU331096.1
Atriplex_buchananii_EU331097.1
Atriplex_canescens_AM420672.1
Atriplex_canescens_AM420673.1
Atriplex_canescens_AM420674.1
Atriplex_canescens_AM420675.1
Atriplex_canescens_AM420676.1
Atriplex_canescens_FJ601827.1
Atriplex_canescens_FJ601829.1
Atriplex_canescens_FJ601830.1
Atriplex_canescens_FJ601831.1
Atriplex_canescens_FJ601834.1
Atriplex_canescens_FJ601835.1
Atriplex_canescens_FJ601837.1
Atriplex_cinerea_EU812821.1
Atriplex_halimus_AM420677.1
Atriplex_halimus_AM420678.1
Atriplex_halimus_AM420679.1
Atriplex_halimus_AM420680.1
Atriplex_halimus_AM420682.1
Atriplex_halimus_AM420686.1
Atriplex_hollowayi_EU812822.1
Atriplex_lentiformis_AM420687.1
Atriplex_lentiformis_AM420688.1
Atriplex_lentiformis_AM420690.1
Atriplex_nummularia_AM420694.1
Atriplex_semibaccata_AM420696.1
Atriplex_semibaccata_AM420697.1
Atriplex_semibaccata_AM420698.1
Atriplex_semibaccata_AM420699.1
Atriplex_semibaccata_AM420700.1
Atriplex_undulata_AM420701.1
Atriplex_undulata_AM420702.1
Atriplex_undulata_AM420703.1
Atriplex_undulata_AM420704.1
Augouardia_letestui_AY955796.1
Aulax_cancellata_EU676063.1
Aureolaria_pedicularia_EU827879.1
Austrosteenisia_blackii_AY124765.1
Avena_atlantica_DQ341307.1
Avena_canariensis_AY497471.1
Avena_damascena_AY881171.1
Avena_hirtula_AY522434.1
Avena_hirtula_AY522435.1
Avena_macrostachya_AY522433.1
Avena_sativa_AY520821.1
Avena_sterilis_DQ364236.1
Avena_strigosa_DQ435067.1
Avena_ventricosa_AY522437.1
Avena_wiestii_AY216261.1
Avenula_aetolica_EU792329.1
Averrhoa_bilimbi_EU436862.1
Averrhoa_carambola_EU436863.1
Avicennia_bicolor_AF365977.1
Avicennia_germinans_AF365979.1
Axinaea_affinis_AY460447.1
Axinaea_grandifolia_AY460448.1
Axyris_hybrida_AM849226.1
Axyris_prostrata_AM849228.1
Azadirachta_indica_FJ518867.1
Baccharis_salicifolia_EF190032.1
Baikiaea_insignis_AY955811.1
Baliospermum_calycinum_FJ980284.1
Balsamocitrus_dawei_FJ434166.1
Bambusa_balcooa_EU244594.1
Bambusa_bambos_DQ915808.1
Bambusa_oldhamii_GQ464815.1
Bambusa_oliveriana_EU368961.1
Bambusa_polymorpha_EU244595.1
Banksia_ericifolia_EU676093.1
Barbosella_dolichorhiza_EF079370.1
Barleria_repens_AF169750.1
Barnebya_dispar_AY137314.1
Barthlottia_madagascariensis_AJ550576.1
Basananthe_hanningtoniana_DQ521294.1
Basananthe_sandersonii_DQ521292.1
Basananthe_triloba_DQ521293.1
Bashania_fargesii_GQ464808.1
Bassia_dasyphylla_AY489195.1
Bassia_hirsuta_AY489196.1
Bassia_muricata_AY489198.1
Bassia_prostrata_AY489216.1
Bassia_scoparia_FJ599757.1
Bassia_scoparia_FJ980361.1
Bassia_sedoides_AY489199.1
Batemania_lepida_AY870089.1
Batopedina_pulvinellata_AM266989.1
Baumea_arthrophylla_DQ385550.1
Baumea_arthrophylla_DQ385551.1
Baumea_articulata_DQ385552.1
Baumea_complanata_DQ385553.1
Baumea_tenax_DQ385554.1
Baumea_teretifolia_DQ385555.1
Beauprea_montana_EU676065.1
Beccariella_brownlessiana_DQ154063.1
Beccariella_crebrifolia_DQ154042.1
Beccariella_lasiantha_DQ154044.1
Beccariella_longipetiolata_DQ154045.1
Beccariella_macrocarpa_DQ154073.1
Beccariella_papyracea_DQ154046.1
Beccariella_sebertii_DQ154047.1
Beccariella_vieillardii_DQ154087.1
Beckmannia_syzigachne_EU792342.1
Bedfordia_linearis_AY554091.1
Bedfordia_salicina_AF422110.1
Begonia_ampla_AY429306.1
Begonia_ankaranensis_AF485229.1
Begonia_aptera_AJ491195.1
Begonia_aptera_AJ491196.1
Begonia_aspleniifolia_AF485227.1
Begonia_austrotaiwanensis_AJ491198.1
Begonia_baccata_AY429305.1
Begonia_bonus-henricus_AY429308.1
Begonia_buimontana_AJ491200.1
Begonia_chitoensis_AJ491204.1
Begonia_chitoensis_AJ491205.1
Begonia_chitoensis_AJ491206.1
Begonia_comorensis_AY429326.1
Begonia_crassirostris_AJ491207.1
Begonia_deliciosa_AF485121.1
Begonia_dipetala_AF469124.1
Begonia_dregei_AF469125.1
Begonia_dregei_AF469126.1
Begonia_dregei_AY429336.1
Begonia_duncan-thomasii_AF485224.1
Begonia_formosana_AJ491208.1
Begonia_formosana_AJ491209.1
Begonia_formosana_AJ491210.1
Begonia_formosana_AJ491212.1
Begonia_formosana_AJ491213.1
Begonia_formosana_AJ491215.1
Begonia_formosana_AJ491216.1
Begonia_formosana_AJ491218.1
Begonia_formosana_AJ491219.1
Begonia_formosana_AJ491220.1
Begonia_formosana_AJ491223.1
Begonia_formosana_AJ491225.1
Begonia_formosana_AJ491227.1
Begonia_formosana_AJ491228.1
Begonia_formosana_AJ491229.1
Begonia_formosana_AJ491230.1
Begonia_formosana_AJ491231.1
Begonia_formosana_AJ491233.1
Begonia_formosana_AJ491237.1
Begonia_formosana_AJ491239.1
Begonia_formosana_AJ491242.1
Begonia_furfuracea_AY429325.1
Begonia_fusialata_AY429320.1
Begonia_geranioides_AF469120.1
Begonia_gracilis_AF485202.1
Begonia_hatacoa_AF485111.1
Begonia_homonyma_AY429334.1
Begonia_involucrata_AF485209.1
Begonia_isalensis_AY429328.1
Begonia_labordei_AF485122.1
Begonia_lukuana_AJ491243.1
Begonia_lukuana_AJ491244.1
Begonia_luxurians_AF485194.1
Begonia_luxurians_AF485196.1
Begonia_madecassa_AF485230.1
Begonia_nantoensis_AJ491246.1
Begonia_obliqua_AF485170.1
Begonia_odorata_AF485168.1
Begonia_oxyphylla_AF485190.1
Begonia_palmata_AJ491248.1
Begonia_peltata_AF485210.1
Begonia_preussii_AY429321.1
Begonia_ravenii_AJ491250.1
Begonia_reniformis_AF485180.1
Begonia_socotrana_AF469121.1
Begonia_socotrana_AY429335.1
Begonia_sonderiana_AF485216.1
Begonia_taiwaniana_AJ491251.1
Begonia_taiwaniana_AJ491252.1
Begonia_valida_AF485182.1
Bellardiochloa_variegata_EU792362.1
Bellendena_montana_EU676066.1
Bellucia_pentamera_AY460562.1
Benincasa_hispida_FJ980302.1
Benzingia_caudata_AY870027.1
Benzingia_cornuta_AY870026.1
Benzingia_estradae_AY870029.1
Benzingia_hajekii_AY870028.1
Benzingia_hirtzii_AY870030.1
Berberis_fortunei_FJ980428.1
Berlinia_confusa_AF513669.1
Berneuxia_thibetica_AY049798.1
Berteroa_incana_AY254544.1
Besseya_alpina_AY483210.1
Besseya_bullii_AY483184.1
Besseya_bullii_AY483209.1
Besseya_bullii_AY483211.1
Besseya_plantaginea_AY483208.1
Besseya_rubra_AY483201.1
Besseya_wyomingensis_AY483203.1
Besseya_wyomingensis_AY483204.1
Besseya_wyomingensis_AY483206.1
Besseya_wyomingensis_AY483207.1
Besseya_wyomingensis_AY483213.1
Besseya_wyomingensis_AY483214.1
Bethencourtia_hermosae_EF538159.1
Bethencourtia_palmensis_EF538160.1
Bethencourtia_rupicola_EF538161.1
Bidens_alba_EF107649.1
Bifrenaria_inodora_DQ210217.1
Bifrenaria_tyrianthina_DQ210235.1
Bikinia_aciculifera_AF513670.1
Bikinia_aciculifera_AF513671.1
Bikinia_breynei_AF513672.1
Bikinia_congensis_AF513673.1
Bikinia_congensis_AF513674.1
Bikinia_coriacea_AF513675.1
Bikinia_durandii_AF513676.1
Bikinia_evrardii_AF513677.1
Bikinia_grisea_AF513678.1
Bikinia_media_AF513681.1
Bikinia_media_AF513682.1
Bikinia_pellegrinii_AF513683.1
Bikinia_pellegrinii_AF513684.1
Bikinia_pellegrinii_AF513685.1
Biophytum_abyssinicum_EU436864.1
Biscutella_auriculata_DQ452057.1
Biscutella_didyma_DQ452058.1
Blakea_gracilis_AY460445.1
Blakea_purpusii_AY460440.1
Blakea_schlimii_AY460441.1
Blennosperma_nanum_EF538158.1
Blumeodendron_kurzii_DQ866525.1
Blyxa_aubertii_AY870359.1
Boechera_divaricarpa_GQ166420.1
Boechera_stricta_DQ310533.1
Boechera_stricta_GQ166414.1
Boehmeria_clidemioides_EU003920.1
Boehmeria_clidemioides_EU003921.1
Boehmeria_clidemioides_EU003922.1
Boehmeria_clidemioides_EU003923.1
Boehmeria_clidemioides_EU003924.1
Boehmeria_clidemioides_EU003925.1
Boehmeria_nivea_EU003917.1
Boehmeria_nivea_EU003918.1
Boehmeria_nivea_EU003919.1
Boehmeria_nivea_EU747095.1
Boehmeria_nivea_EU747099.1
Boehmeria_nivea_EU747115.1
Boehmeria_nivea_FJ980383.1
Boehmeria_siamensis_FJ980384.1
Boerhavia_coccinea_AF212013.1
Boerhavia_coccinea_DQ317084.1
Boerhavia_erecta_DQ317080.1
Boerhavia_gracillima_DQ317083.1
Boerhavia_intermedia_DQ317082.1
Boerhavia_spicata_DQ317081.1
Boesenbergia_pulcherrima_AF478725.1
Boesenbergia_rotunda_AF478726.1
Bolandia_argillacea_AY953924.1
Bolandia_pedunculosa_AY953925.1
Bolboschoenus_caldwellii_DQ385556.1
Bolbostemma_paniculatum_FJ980305.1
Bomarea_callejasiana_EU159934.1
Bomarea_cumbrensis_EU159936.1
Bomarea_diffracta_EU159937.1
Bomarea_edulis_EU159938.1
Bomarea_glaucescens_EU159942.1
Bomarea_linifolia_EU159947.1
Bomarea_patinii_EU159951.1
Bombax_malabaricum_DQ826447.1
Bonamia_media_DQ219867.1
Boopis_anthemoides_EU841175.1
Bourreria_succulenta_DQ197285.1
Bouteloua_gracilis_EU144372.1
Bouteloua_gracilis_EU144379.1
Bouteloua_gracilis_EU144384.1
Bouvardia_glaberrima_AM939432.1
Brachanthemum_pulvinatum_EF577291.1
Brachtia_andina_FJ565599.1
Brachtia_glumacea_EF079407.1
Brachyglottis_adamsii_AY554092.1
Brachyglottis_arborescens_EF635450.1
Brachyglottis_bellidioides_AY554094.1
Brachyglottis_brunonis_AY554095.1
Brachyglottis_cassinioides_AY554096.1
Brachyglottis_elaeagnifolia_AF422111.1
Brachyglottis_greyi_AY554098.1
Brachyglottis_greyi_EF660537.1
Brachyglottis_haastii_AY554099.1
Brachyglottis_huntii_AY554100.1
Brachyglottis_huntii_EF635446.1
Brachyglottis_kirkii_AY554101.1
Brachyglottis_perdicioides_AY554102.1
Brachyglottis_repanda_EF635458.1
Brachyglottis_revoluta_EF660536.1
Brachyglottis_southlandica_AF422112.1
Brachyglottis_stewartiae_EF635459.1
Brachylophon_curtisii_AY137313.1
Brachyscome_humilis_AF422113.1
Brachystachyum_densiflorum_GQ464809.1
Brachystegia_longifolia_AF513687.1
Brachystigma_wrightii_EU827880.1
Brandzeia_filicifolia_AY955794.1
Brasiliocroton_mamoninha_EU586944.1
Brassaiopsis_ciliata_AF551723.1
Brassaiopsis_elegans_DQ007363.1
Brassaiopsis_fatsioides_AF551725.1
Brassaiopsis_ficifolia_AF551722.1
Brassaiopsis_ficifolia_DQ007403.1
Brassaiopsis_gracilis_AF551721.1
Brassaiopsis_malayana_DQ007367.1
Brassaiopsis_mitis_AF551726.1
Brassaiopsis_phanrangensis_AF551724.1
Brassaiopsis_polyacantha_DQ007364.1
Brassaiopsis_tripteris_AY256898.1
Brassia_aurorae_FJ565439.1
Brassia_jipijapensis_FJ565253.1
Brassia_signata_FJ565438.1
Brassia_villosa_FJ565636.1
Brassica_juncea_FJ980406.1
Bravaisia_integerrima_EF214413.1
Breviea_sericea_DQ246666.1
Breynia_cernua_AY936650.1
Breynia_discigera_EU623550.1
Breynia_disticha_AY936651.1
Breynia_glauca_EU623551.1
Breynia_mollis_EU623552.1
Breynia_retusa_AY936652.1
Breynia_vestita_EU623553.1
Breynia_vitis-idaea_AY936653.1
Bridelia_affinis_FJ439898.1
Bridelia_affinis_FJ439899.1
Bridelia_atroviridis_FJ439921.1
Bridelia_balansae_FJ439901.1
Bridelia_balansae_FJ439902.1
Bridelia_balansae_FJ439903.1
Bridelia_balansae_FJ439904.1
Bridelia_brideliifolia_FJ439922.1
Bridelia_cathartica_FJ439929.1
Bridelia_curtisii_FJ439914.1
Bridelia_harmandii_FJ439900.1
Bridelia_insulana_FJ439906.1
Bridelia_leichhardtii_FJ439905.1
Bridelia_micrantha_FJ439920.1
Bridelia_mollis_FJ439925.1
Bridelia_ovata_FJ439908.1
Bridelia_retusa_FJ439907.1
Bridelia_retusa_FJ439909.1
Bridelia_retusa_FJ439910.1
Bridelia_scleroneura_FJ439927.1
Bridelia_scleroneura_FJ439928.1
Bridelia_stipularis_FJ439911.1
Bridelia_stipularis_FJ439912.1
Bridelia_stipularis_FJ439913.1
Bridelia_tenuifolia_FJ439923.1
Bridelia_tomentosa_FJ439915.1
Bridelia_tomentosa_FJ439916.1
Bridelia_tomentosa_FJ439917.1
Bridelia_tomentosa_FJ439918.1
Briza_calotheca_EU528612.1
Briza_calotheca_EU528613.1
Briza_elatior_EU935582.1
Briza_marcowicsii_FJ008711.1
Briza_monandra_EU532609.1
Briza_rufa_var._rufa_EU528611.1
Briza_rufa_var._sparsipilosa_EU528610.1
Briza_uniolae_EU528604.1
Briza_uniolae_EU528605.1
Bromus_ayacuchensis_DQ676867.1
Bromus_catharticus_FJ461259.1
Brosimum_guianense_AY635484.1
Brosimum_guianense_AY635487.1
Brosimum_guianense_AY635490.1
Bryonia_acuta_EU102673.1
Bryonia_acuta_EU102674.1
Bryonia_acuta_EU102675.1
Bryonia_acuta_EU102676.1
Bryonia_alba_EU102679.1
Bryonia_alba_EU102680.1
Bryonia_alba_EU102681.1
Bryonia_alba_EU102682.1
Bryonia_alba_EU102683.1
Bryonia_aspera_EU102684.1
Bryonia_aspera_EU102685.1
Bryonia_aspera_EU102687.1
Bryonia_aspera_EU102688.1
Bryonia_aspera_EU102691.1
Bryonia_aspera_EU102692.1
Bryonia_cretica_EU102693.1
Bryonia_cretica_EU102694.1
Bryonia_cretica_EU102695.1
Bryonia_cretica_EU102696.1
Bryonia_cretica_EU102697.1
Bryonia_cretica_EU102698.1
Bryonia_dioica_EU102699.1
Bryonia_dioica_EU102700.1
Bryonia_dioica_EU102701.1
Bryonia_dioica_EU102702.1
Bryonia_dioica_EU102703.1
Bryonia_dioica_EU102704.1
Bryonia_dioica_EU102705.1
Bryonia_dioica_EU102706.1
Bryonia_dioica_EU102707.1
Bryonia_dioica_EU102708.1
Bryonia_dioica_EU102709.1
Bryonia_marmorata_EU102710.1
Bryonia_marmorata_EU102711.1
Bryonia_marmorata_EU102712.1
Bryonia_marmorata_EU102713.1
Bryonia_marmorata_EU102714.1
Bryonia_marmorata_EU102715.1
Bryonia_marmorata_EU102716.1
Bryonia_marmorata_EU102717.1
Bryonia_marmorata_EU102718.1
Bryonia_melanocarpa_EU102719.1
Bryonia_melanocarpa_EU102721.1
Bryonia_melanocarpa_EU102722.1
Bryonia_melanocarpa_EU102723.1
Bryonia_melanocarpa_EU102724.1
Bryonia_monoica_EU102725.1
Bryonia_monoica_EU102726.1
Bryonia_monoica_EU102727.1
Bryonia_monoica_EU102728.1
Bryonia_monoica_EU102729.1
Bryonia_syriaca_EU102730.1
Bryonia_syriaca_EU102732.1
Bryonia_syriaca_EU102734.1
Bryonia_verrucosa_EU102735.1
Bryonia_verrucosa_EU102736.1
Bryonia_verrucosa_EU102737.1
Bryonia_verrucosa_EU102738.1
Bryonia_verrucosa_EU102740.1
Bryonia_verrucosa_EU102741.1
Buddleja_marrubiifolia_AF363671.1
Buddleja_polystachya_AJ550577.1
Buddleja_thyrsoides_AJ550579.1
Bulbine_latifolia_EU707290.1
Bulbophyllum_burfordiense_AY273716.1
Bupleurum_chinense_AY551293.1
Bupleurum_falcatum_AY551290.1
Bupleurum_latissimum_AY551292.1
Bupleurum_longiradiatum_AY551291.1
Bupleurum_scorzonerifolium_AY551294.1
Burmannia_alba_EU816750.1
Burmannia_bicolor_EU816752.1
Burmannia_bicolor_EU816753.1
Burmannia_biflora_EU816751.1
Burmannia_capitata_EU816733.1
Burmannia_coelestis_EU816739.1
Burmannia_disticha_EU816738.1
Burmannia_flava_EU816755.1
Burmannia_flava_EU816756.1
Burmannia_madagascariensis_EU816743.1
Burmannia_nepalensis_EU816748.1
Burmannia_pusilla_EU816745.1
Burmannia_stuebelii_EU816754.1
Burmannia_wallichii_EU816741.1
Bursera_chemapodicta_AF080038.1
Bursera_crenata_AF080055.1
Bursera_multijuga_AF080058.1
Bursera_paradoxa_AF080057.1
Bursera_trimera_AF080056.1
Butomas_umbellatus_AY870346.1
Byrsonima_vaccinifolia_DQ787387.1
Caesalpinia_sappan_EU243573.1
Cakile_maritima_AY254541.1
Calamagrostis_phragmitoides_FJ010633.1
Calamagrostis_pseudophragmites_EU887016.1
Calamagrostis_purpurea_FJ013223.1
Calamus_nagbettai_FJ842643.1
Calamus_palustris_FJ842645.1
Calamus_viminalis_FJ842644.1
Calanda_rubricaulis_AM266990.1
Calathea_crotalifera_AY673045.1
Calathea_metallica_AY673046.1
Calathea_micans_AY673047.1
Calathea_rufibarba_AY673048.1
Calathea_warscewiczii_AY673049.1
Calceolaria_ballotifolia_AJ579434.1
Calceolaria_barbata_AJ579409.1
Calceolaria_bicrenata_AJ579422.1
Calceolaria_biflora_AJ579390.1
Calceolaria_boliviana_AJ579404.1
Calceolaria_brachiata_AJ579462.1
Calceolaria_buchtieniana_AJ579411.1
Calceolaria_calycina_AJ579444.1
Calceolaria_chelidonioides_AJ579441.1
Calceolaria_connatifolia_AJ579469.1
Calceolaria_cypripediiflora_AJ579405.1
Calceolaria_dentifolia_AJ579450.1
Calceolaria_dichotoma_AJ579437.1
Calceolaria_dilatata_AJ579464.1
Calceolaria_fusca_AJ579466.1
Calceolaria_germainii_AJ579387.1
Calceolaria_glauca_AJ579423.1
Calceolaria_gossypina_AJ579459.1
Calceolaria_helianthemoides_AJ579461.1
Calceolaria_inflexa_AJ579418.1
Calceolaria_integrifolia_AJ579396.1
Calceolaria_lamiifolia_AJ579435.1
Calceolaria_lanata_AJ579447.1
Calceolaria_lavandulifolia_AJ579460.1
Calceolaria_lehmanniana_AJ579454.1
Calceolaria_lobata_AJ579428.1
Calceolaria_maculata_AJ579433.1
Calceolaria_mandoniana_AJ579442.1
Calceolaria_martinezii_AJ579456.1
Calceolaria_moyobambae_AJ579449.1
Calceolaria_myriophylla_AJ579403.1
Calceolaria_oblonga_AJ579414.1
Calceolaria_obtusa_AJ579432.1
Calceolaria_pavonii_AJ579445.1
Calceolaria_pennellii_AJ579389.1
Calceolaria_perfoliata_AJ579443.1
Calceolaria_phaceliifolia_AJ579429.1
Calceolaria_pinifolia_AJ579392.1
Calceolaria_plectranthifolia_AJ579398.1
Calceolaria_polifolia_AJ579397.1
Calceolaria_polyclada_AJ579402.1
Calceolaria_polyrhiza_AJ579391.1
Calceolaria_revoluta_AJ579407.1
Calceolaria_rivularis_AJ579440.1
Calceolaria_rosmarinifolia_AJ579457.1
Calceolaria_rugulosa_AJ579430.1
Calceolaria_rupestris_AJ579406.1
Calceolaria_scabra_AJ579421.1
Calceolaria_semiconnata_AJ579467.1
Calceolaria_sericea_AJ579426.1
Calceolaria_sparsiflora_AJ579417.1
Calceolaria_spruceana_AJ579458.1
Calceolaria_tenella_AJ579400.1
Calceolaria_teucrioides_AJ579413.1
Calceolaria_thyrsiflora_AJ579395.1
Calceolaria_tomentosa_AJ579446.1
Calceolaria_tripartita_AJ579439.1
Calceolaria_tucumana_AJ579399.1
Calceolaria_umbellata_AJ579384.1
Calceolaria_utricularioides_AJ579438.1
Calceolaria_vaccinioides_AJ579419.1
Calceolaria_variifolia_AJ579425.1
Calceolaria_virgata_AJ579431.1
Calceolaria_vulpina_AJ579416.1
Calderonella_sylvatica_AM404343.1
Calepina_irregularis_AM905715.1
Callerya_cinerea_FJ980295.1
Callistemon_lanceolatus_FM887012.1
Calodecaryia_crassifolia_DQ861631.1
Calophyllum_inophyllum_AJ312608.2
Calophyllum_longifolium_AJ312609.2
Calycera_crassifolia_EU841176.1
Calycogonium_floribundum_EU055644.1
Calycogonium_glabratum_EU055645.1
Calycogonium_grisebachii_EU055646.1
Calycogonium_heterophyllum_EU055647.1
Calycogonium_hispidulum_EU055648.1
Calycogonium_plicatum_EU055649.1
Calycogonium_revolutum_EU055650.1
Calycogonium_rosmarinifolium_EU055651.1
Calycogonium_tetragonolobum_EU055652.1
Calystegia_marginata_EU812826.1
Calystegia_marginata_EU812827.1
Calystegia_silvatica_EU812830.1
Calystegia_silvatica_EU812831.1
Calystegia_soldanella_EU812832.1
Calystegia_soldanella_EU812833.1
Calystegia_tuguriorum_EU812834.1
Calystegia_tuguriorum_EU812835.1
Camelina_microcarpa_DQ310531.1
Campanumoea_lancifolia_EF206701.1
Camphorosma_monspeliaca_AY489200.1
Camphorosma_songorica_AY489201.1
Camptandra_parvula_AF478730.1
Campuloclinium_macrocephalum_AY576863.1
Campylosiphon_purpurascens_EU816710.1
Canavalia_gladiata_FJ176928.1
Canna_paniculata_AY673069.1
Capanemia_superflua_FJ565195.1
Capsella_bursa-pastoris_DQ310530.1
Capsella_grandiflora_AM905718.1
Capsella_rubella_AY254537.1
Capsicum_lycianthoides_DQ314158.1
Capurodendron_androyense_AM408107.1
Capuronianthus_mahafalensis_FJ518868.1
Caragana_acanthophylla_AB262523.1
Caragana_acanthophylla_DQ914778.2
Caragana_arborescens_DQ311963.1
Caragana_bicolor_DQ914790.2
Caragana_bongardiana_AB262528.1
Caragana_bongardiana_DQ914777.2
Caragana_brachypoda_DQ914783.2
Caragana_dasyphylla_DQ914786.2
Caragana_davazamcii_AY626913.2
Caragana_densa_DQ914788.2
Caragana_erinacea_AB262532.1
Caragana_franchetiana_EU243572.1
Caragana_hololeuca_AB262524.1
Caragana_hololeuca_DQ914779.2
Caragana_jubata_DQ914787.2
Caragana_jubata_EU243571.1
Caragana_korshinskii_AY626914.3
Caragana_leucophloea_AB262535.1
Caragana_licentiana_DQ914776.2
Caragana_microphylla_AY626915.2
Caragana_microphylla_DQ311964.1
Caragana_opulens_AB262531.1
Caragana_ordosica_DQ914780.2
Caragana_pruinosa_AB262533.1
Caragana_purdomii_AB262529.1
Caragana_purdomii_DQ914784.2
Caragana_roborovskyi_AF521958.1
Caragana_roborovskyi_DQ914781.2
Caragana_rosea_AB262526.1
Caragana_rosea_DQ914775.2
Caragana_sibirica_AY626912.2
Caragana_sinica_DQ914785.2
Caragana_stenophylla_AB262525.1
Caragana_stenophylla_DQ914782.2
Caragana_tibetica_AB262527.1
Caragana_tibetica_DQ914789.2
Caragana_tibetica_EU243570.1
Caragana_tragacanthoides_AB262536.1
Caragana_zahlbruckneri_AB262530.1
Carapa_angustifolia_FJ518869.1
Carapa_batesii_FJ518870.1
Carapa_dinklagei_FJ518871.1
Carapa_grandiflora_FJ518872.1
Carapa_guianensis_FJ518873.1
Carapa_hygrophila_FJ518874.1
Carapa_macrantha_FJ518875.1
Carapa_megistocarpa_FJ518876.1
Carapa_microcarpa_FJ518877.1
Carapa_nicaraguensis_FJ518878.1
Carapa_parviflora_FJ518879.1
Carapa_procera_FJ518880.1
Carapa_surinamensis_FJ518891.1
Carapa_velutina_FJ518892.1
Cardamine_alpina_AM905716.1
Cardamine_flexuosa_AM905717.1
Cardamine_flexuosa_EF523392.1
Cardamine_flexuosa_EF523394.1
Cardamine_flexuosa_EF523395.1
Cardamine_flexuosa_EF523396.1
Cardamine_flexuosa_EF523398.1
Cardamine_flexuosa_EF523401.1
Cardamine_flexuosa_EF523402.1
Cardamine_hirsuta_AM905719.1
Cardamine_hirsuta_EF523391.1
Cardamine_hirsuta_EF523400.1
Cardamine_impatiens_AM905720.1
Carex_acutiformis_AY278300.1
Carex_albula_AY699614.1
Carex_appressa_AY699637.1
Carex_austroalpina_AY278276.1
Carex_berggrenii_EU352219.1
Carex_bigelowii_AY278303.1
Carex_brachystachys_AY278277.1
Carex_breviculmis_AY699627.1
Carex_buchananii_AY699632.1
Carex_capillaris_AY278256.1
Carex_carsei_EU352220.1
Carex_chathamica_AY699641.1
Carex_cirrhosa_AY699633.1
Carex_cockayneana_EU352221.1
Carex_colensoi_EU352222.1
Carex_comans_AY699629.1
Carex_dallii_AY699631.1
Carex_demissa_AY278307.1
Carex_diandra_AY699626.1
Carex_dipsacea_AY699622.1
Carex_dipsacea_EU352223.1
Carex_dissita_EU331110.1
Carex_dissita_EU331111.1
Carex_dissita_EU331112.1
Carex_echinata_EU352224.1
Carex_elata_AY278255.1
Carex_elingamita_AY699636.1
Carex_enysii_EU352225.1
Carex_extensa_AY278311.1
Carex_fascicularis_EU352234.1
Carex_flagellifera_AY699613.1
Carex_flaviformis_AY699610.1
Carex_forsteri_AY699635.1
Carex_fretalis_EU352226.1
Carex_frigida_AY278291.1
Carex_geminata_EU352227.1
Carex_hectorii_AY699618.1
Carex_hostiana_AY278309.1
Carex_humilis_AY278260.1
Carex_inversa_AY699625.1
Carex_kaloides_AY699638.1
Carex_kermadecensis_AY699617.1
Carex_lambertiana_EU352236.1
Carex_lasiocarpa_AY278297.1
Carex_libera_EU352228.1
Carex_litorosa_AY699616.1
Carex_magellanica_AY278292.1
Carex_maorica_AY699619.1
Carex_montana_AY278271.1
Carex_mucronata_AY278257.1
Carex_ochrosaccus_EU331113.1
Carex_ochrosaccus_EU331114.1
Carex_ophiolithica_EU352229.1
Carex_ornithopodioides_AY278268.1
Carex_panicea_AY278284.1
Carex_parviflora_AY278265.1
Carex_petriei_AY699644.1
Carex_pseudocyperus_AY278295.1
Carex_pumila_EU352230.1
Carex_raoulii_AY699630.1
Carex_resectans_EU352231.1
Carex_resectans_EU352237.1
Carex_rostrata_AY278294.1
Carex_secta_AY699611.1
Carex_sectoides_AY699639.1
Carex_serrulata_AY278273.1
Carex_solandri_EU331115.1
Carex_solandri_EU331116.1
Carex_spinirostris_EU352232.1
Carex_tenuiculmis_AY699624.1
Carex_ternaria_EU352233.1
Carex_testacea_AY699621.1
Carex_trifida_AY699620.1
Carex_uncifolia_AY699612.1
Carex_ventosa_AY699628.1
Carex_vesicaria_AY278289.1
Carex_virgata_AY699623.1
Carex_virgata_AY699642.1
Carex_viridula_AY278308.1
Carex_wakatipu_EU352238.1
Carlowrightia_arizonica_AF169845.1
Carlowrightia_haplocarpa_EU087450.1
Carlowrightia_neesiana_EU087436.1
Carpha_alpina_DQ385557.1
Carphalea_angulata_AM266991.1
Carphalea_cloiselii_AM266992.1
Carphalea_glaucescens_AM266993.1
Carphalea_kirondron_AM266994.1
Carphalea_madagascariensis_AM266995.1
Carphalea_obovata_AM266996.1
Carphalea_pervilleana_AM266997.1
Carphalea_pubescens_AM266998.1
Carphochaete_grahamii_AB457329.1
Carpinus_betulus
Carthamus_tinctorius_EF483943.1
Carthamus_tinctorius_EF483944.1
Carthamus_tinctorius_EF483945.1
Carthamus_tinctorius_EF483946.1
Carthamus_tinctorius_EF483947.1
Carthamus_tinctorius_EF483949.1
Carthamus_tinctorius_EF483950.1
Carthamus_tinctorius_FJ539127.1
Castilla_elastica_AY730143.1
Castilleja_arachnoidea_EF103691.1
Castilleja_arvensis_EF103698.1
Castilleja_attenuata_EF103687.1
Castilleja_conzattii_EF103697.1
Castilleja_cusickii_EF103694.1
Castilleja_elmeri_EF103709.1
Castilleja_lacera_EF103683.1
Castilleja_lasiorhyncha_EF103684.1
Castilleja_lemmonii_EF103693.1
Castilleja_lutescens_EF103711.1
Castilleja_miniata_EF103712.1
Castilleja_occidentalis_EF103710.1
Castilleja_parviflora_EF103701.1
Castilleja_peckiana_EF103700.1
Castilleja_peirsonii_EF103702.1
Castilleja_pilosa_EF103690.1
Castilleja_pruinosa_EF103707.1
Castilleja_racemosa_EF103680.1
Castilleja_tenuis_EF103682.1
Castilleja_xanthotricha_EF103706.1
Castilleja_zempoaltepetlensis_EF103703.1
Catabrosa_werdermannii_EU792333.1
Catabrosella_araratica_FJ196300.1
Catabrosella_variegata_AY862811.1
Catabrosella_variegata_EU792332.1
Catasetum_fimbriatum_EU441210.1
Catasetum_saccatum_EU441204.1
Caucaea_andigena_FJ565519.1
Caucaea_cucullata_AF432952.1
Caucaea_cucullata_FJ565530.1
Caucaea_kennedyi_AF432951.1
Caucaea_mimetica_AF432953.1
Caucaea_nubigena_AF432954.1
Caucaea_nubigena_FJ565506.1
Caucaea_olivacea_AF432956.1
Caucaea_phalaenopsis_AF432950.1
Caucaea_phalaenopsis_FJ565529.1
Caucaea_radiata_AF432949.1
Caucaea_radiata_FJ565576.1
Caucaea_rhodosticta_AF432955.1
Caucanthus_auriculatus_AF436781.1
Caucasalia_parviflora_EF538162.1
Caucasalia_parviflora_EF538163.1
Caulokaempferia_coenobialis_AF478731.1
Caulokaempferia_saxicola_AF478732.1
Cautleya_gracilis_AF478734.1
Cautleya_spicata_AF478735.1
Cedrela_angustifolia_FJ462478.1
Cedrela_angustifolia_FJ462479.1
Cedrela_balansae_FJ462473.1
Cedrela_fissilis_FJ462475.1
Cedrela_fissilis_FJ518893.1
Cedrela_montana_FJ462480.1
Cedrela_montana_FJ462481.1
Cedrela_oaxacensis_FJ462482.1
Cedrela_odorata_DQ861606.1
Cedrela_odorata_FJ462464.1
Cedrela_odorata_FJ462467.1
Cedrela_odorata_FJ462468.1
Cedrela_odorata_FJ462471.1
Cedrela_saltensis_FJ462462.1
Cedrela_salvadorensis_FJ462484.1
Cedrela_weberbaueri_FJ462472.1
Ceiba_pentandra_DQ284854.1
Ceiba_pentandra_EF432374.1
Ceiba_pentandra_EF432375.1
Celmisia_armstrongii_EU331140.1
Celmisia_densiflora_EU331141.1
Celmisia_mackaui_AF422115.1
Celmisia_semicordata_EU331142.1
Celmisia_similis_EU331143.1
Cenarrhenes_nitida_EU676067.1
Centipeda_aotearoana_EU352239.1
Centipeda_cunninghamii_AF422116.1
Centipeda_minima_DQ826452.1
Centipeda_minima_FJ980325.1
Centipeda_minima_FJ980326.1
Cephalanthera_damasonium_AY146446.1
Cephalanthera_longifolia_AY146447.1
Cephalanthera_rubra_AY146445.1
Cephalostachyum_pergracile_GQ464810.1
Cestrum_elegans_AJ492459.1
Cestrum_nocturnum_AY206731.1
Chaetanthera_pulvinata_EF530255.1
Chamelaucium_uncinatum_EF026605.1
Charadranaetes_durandii_EF538164.1
Charadrophila_capensis_AJ616317.1
Chaubardia_klugii_AY870072.1
Chaubardia_surinamensis_AY870073.1
Chaubardiella_pacuarensis_AY870046.1
Chaubardiella_pubescens_AY870043.1
Chaubardiella_subquadrata_AY870044.1
Chaubardiella_tigrina_AY870045.1
Cheiloclinium_cognatum_FJ705511.1
Chelidonium_majus_DQ912878.1
Chelidonium_majus_FJ980435.1
Chelyorchis_ampliata_EF065706.1
Chelyorchis_ampliata_EF065707.1
Chengiopanax_sciadophylloides_AM400882.1
Chenolea_diffusa_AY489202.1
Chenoleoides_arabica_AY489203.1
Chenoleoides_tomentosa_AY489204.1
Chenopodiopsis_retrorsa_AJ584757.1
Chenopodium_ambiguum_EU812823.1
Chenopodium_ambrosioides_FJ980362.1
Chenopodium_detestans_EU812824.1
Chersodoma_diclina_EF538166.1
Chersodoma_jodopappa_EF538167.1
Chersodoma_ovopedata_EF538168.1
Chiliotrichum_rosmarinifolium_AF422117.1
Chiloglottis_chlorantha_AY042157.1
Chiloglottis_formicifera_AY042154.1
Chiloglottis_grammata_AY042162.1
Chiloglottis_platypera_AY042156.1
Chiloglottis_pluricallata_AY042158.1
Chiloglottis_reflexa_AY042148.1
Chiloglottis_seminuda_AY042149.1
Chiloglottis_sphyrnoides_AY042151.1
Chiloglottis_sylvestris_AY042150.1
Chiloglottis_trapeziformis_AY042153.1
Chiloglottis_triceratops_AY042160.1
Chiloglottis_trilabra_AY042147.1
Chiloglottis_truncata_AY042152.1
Chiloglottis_valida_AY042161.1
Chimonobambusa_marmorea_GQ464811.1
Chimonobambusa_tumidissinoda_GQ464838.1
Chionogentias_muelleriana_AY136507.1
Chionogentias_polysperes_AY136505.1
Chlorochorion_foetidum_AM266999.1
Chlorochorion_monticola_AM267000.1
Chondrorhyncha_rosea_AY870013.1
Chondroscaphe_amabilis_AY870065.1
Chondroscaphe_atrilinguis_AY870071.1
Chondroscaphe_chestertonii_AY870069.1
Chondroscaphe_eburnea_AY870014.1
Chondroscaphe_escobariana_AY870066.1
Chondroscaphe_flaveola_AY870068.1
Chondroscaphe_laevis_AY870067.1
Chondroscaphe_laevis_AY870070.1
Chorizanthe_angustifolia_EU753735.1
Chorizanthe_angustifolia_EU753736.1
Chorizanthe_angustifolia_EU753737.1
Chorizanthe_angustifolia_EU753738.1
Chorizanthe_angustifolia_EU753739.1
Chorizanthe_cuspidata_EU753740.1
Chorizanthe_cuspidata_EU753741.1
Chorizanthe_cuspidata_EU753742.1
Chorizanthe_cuspidata_EU753743.1
Chorizanthe_cuspidata_EU753744.1
Chorizanthe_cuspidata_EU753756.1
Chorizanthe_cuspidata_EU753757.1
Chorizanthe_diffusa_EU753730.1
Chorizanthe_diffusa_EU753731.1
Chorizanthe_diffusa_EU753732.1
Chorizanthe_diffusa_EU753733.1
Chorizanthe_diffusa_EU753734.1
Chorizanthe_douglasii_EU753775.1
Chorizanthe_howellii_EU753776.1
Chorizanthe_howellii_EU753777.1
Chorizanthe_howellii_EU753778.1
Chorizanthe_howellii_EU753779.1
Chorizanthe_howellii_EU753780.1
Chorizanthe_pungens_EU753749.1
Chorizanthe_pungens_EU753750.1
Chorizanthe_pungens_EU753751.1
Chorizanthe_pungens_EU753752.1
Chorizanthe_pungens_EU753758.1
Chorizanthe_pungens_EU753759.1
Chorizanthe_pungens_EU753760.1
Chorizanthe_pungens_EU753761.1
Chorizanthe_pungens_EU753762.1
Chorizanthe_pungens_EU753766.1
Chorizanthe_pungens_EU753771.1
Chorizanthe_pungens_EU753772.1
Chorizanthe_pungens_EU753774.1
Chorizanthe_robusta_EU753745.1
Chorizanthe_robusta_EU753746.1
Chorizanthe_robusta_EU753747.1
Chorizanthe_robusta_EU753748.1
Chorizanthe_robusta_EU753753.1
Chorizanthe_robusta_EU753754.1
Chorizanthe_robusta_EU753755.1
Chorizanthe_robusta_EU753763.1
Chorizanthe_robusta_EU753764.1
Chorizanthe_robusta_EU753765.1
Chorizanthe_robusta_EU753767.1
Chorizanthe_robusta_EU753768.1
Chorizanthe_robusta_EU753769.1
Chorizanthe_robusta_EU753770.1
Chorizanthe_robusta_EU753773.1
Chorizanthe_valida_EU753781.1
Chorizanthe_valida_EU753782.1
Chorizanthe_valida_EU753783.1
Chorizanthe_valida_EU753784.1
Chorizanthe_valida_EU753785.1
Chosenia_arbutifolia_EF060366.1
Christensonia_vietnamica_EF670357.1
Chromolaena_borinquensis_AY576844.1
Chromolaena_collina_AY576855.1
Chromolaena_odorata_AY576810.1
Chromolaena_odorata_AY576811.1
Chromolaena_odorata_AY576812.1
Chromolaena_odorata_AY576813.1
Chromolaena_odorata_AY576814.1
Chromolaena_odorata_AY576815.1
Chromolaena_odorata_AY576816.1
Chromolaena_odorata_AY576817.1
Chromolaena_odorata_AY576818.1
Chromolaena_odorata_AY576819.1
Chromolaena_odorata_AY576820.1
Chromolaena_odorata_AY576821.1
Chromolaena_odorata_AY576822.1
Chromolaena_odorata_AY576823.1
Chromolaena_odorata_AY576829.1
Chromolaena_odorata_AY576830.1
Chromolaena_odorata_AY576831.1
Chromolaena_odorata_AY576832.1
Chromolaena_odorata_AY576833.1
Chromolaena_odorata_AY576835.1
Chromolaena_odorata_AY576836.1
Chromolaena_odorata_AY576837.1
Chromolaena_odorata_AY576838.1
Chromolaena_odorata_AY576839.1
Chromolaena_odorata_AY576840.1
Chromolaena_odorata_AY576841.1
Chromolaena_odorata_AY576842.1
Chromolaena_odorata_AY576843.1
Chromolaena_odorata_AY576845.1
Chromolaena_odorata_AY576846.1
Chromolaena_odorata_AY576847.1
Chromolaena_odorata_AY576848.1
Chromolaena_odorata_AY576849.1
Chromolaena_odorata_AY576850.1
Chromolaena_odorata_AY576851.1
Chromolaena_odorata_AY576852.1
Chromolaena_odorata_AY576856.1
Chromolaena_odorata_AY576857.1
Chromolaena_odorata_AY576858.1
Chromolaena_odorata_AY576859.1
Chromolaena_odorata_AY576860.1
Chromolaena_odorata_AY576861.1
Chromolaena_odorata_AY576862.1
Chromolaena_odorata_AY576864.1
Chromolaena_squalida_AY576853.1
Chromolucuma_rubriflora_EF558614.1
Chrysactinium_acaule_AF539939.1
Chrysactinium_acaule_AF539940.1
Chrysanthemoides_monilifera_FJ861495.1
Chrysanthemoides_monilifera_FJ861496.1
Chrysanthemoides_monilifera_FJ861497.1
Chrysanthemoides_monilifera_FJ861501.1
Chrysanthemoides_monilifera_FJ861502.1
Chrysanthemoides_monilifera_FJ861503.1
Chrysanthemoides_monilifera_FJ861508.1
Chrysanthemoides_monilifera_FJ861509.1
Chrysanthemoides_monilifera_FJ861510.1
Chrysanthemum_boreale_EF577294.1
Chrysanthemum_chanetii_EF577295.1
Chrysanthemum_coronarium_EF577292.1
Chrysanthemum_crassum_EF577296.1
Chrysanthemum_dichrum_EF577297.1
Chrysanthemum_indicum_EF577298.1
Chrysanthemum_japonense_EF577299.1
Chrysanthemum_japonicum_EF577300.1
Chrysanthemum_lavandulifolium_EF577301.1
Chrysanthemum_lavandulifolium_FJ980354.1
Chrysanthemum_nankingense_EF577302.1
Chrysanthemum_okiense_EF577303.1
Chrysanthemum_oreastrum_EF577304.1
Chrysanthemum_ornatum_EF577305.1
Chrysanthemum_przewalskii_EF577279.1
Chrysanthemum_tatsienense_EF577321.1
Chrysanthemum_vestitum_EF577306.1
Chrysanthemum_yoshinaganthum_EF577308.1
Chrysanthemum_zawadskii_EF577309.1
Chrysochlamys_eclipes_AJ509212.1
Chrysochlamys_grandifolia_AJ509209.1
Chrysochlamys_skutchii_AJ509211.1
Chrysochlamys_tenuis_AJ509210.1
Chrysocycnis_schlimii_DQ210088.1
Chrysocycnis_schlimii_DQ210350.1
Chrysophyllum_bangweolense_AY552152.1
Chrysophyllum_boivinianum_DQ246667.1
[truncated: 10,861 more rows]

## Sheet: Table 3S
genus >=3samples	Numbers of species	Number of samples	Success identification of ITS(%)	Success identification of ITS2 (%)
Achillea	1	3	100	100
Actaea	1	3	100	100
Agropyron	1	3	100	100
Alyssum	1	3	100	100
Bouteloua	1	3	100	100
Brosimum	1	3	100	100
Ceiba	1	3	100	100
Eclipta	1	3	100	100
Gaillardia	1	3	100	100
Hemiptelea	1	3	100	100
Isatis	1	3	100	100
Juglans	1	3	100	100
Luffa	1	3	100	100
Mesona	1	3	100	100
Nematostylis	1	3	100	100
Ophiopogon	1	3	100	100
Raphanus	1	3	100	100
Rheum	1	3	100	100
Tamarindus	1	3	100	100
Ferula	1	4	100	100
Handeliodendron	1	4	100	100
Madangia	1	4	100	100
Saposhnikovia	1	4	100	100
Sigesbeckia	1	4	100	100
Stuckenia	1	4	100	100
Tribulus	1	4	100	100
Arctagrostis	1	5	100	100
Lolium	1	5	100	100
Marsdenia	1	5	100	100
Poulsenia	1	5	100	100
Trema	1	5	100	100
Ochroma	1	6	100	100
Seidenfadenia	1	6	100	100
Gastrodia	1	7	71.4286	71.4286
Commiphora	1	7	100	100
Carthamus	1	8	100	100
Chrysanthemoides	1	9	100	100
Pseudostellaria	1	9	100	100
Viscaria	1	9	100	100
Veratrum	1	10	100	100
Tetradium	1	24	100	100
Euphorbia	1	26	100	100
Symphonia	1	30	100	100
Pogostemon	1	32	100	100
Rehmannia	1	39	100	100
Laportea	2	3	33.3333	33.3333
Aethionema	2	3	100	100
Amphiasma	2	3	100	100
Aphanelytrum	2	3	100	100
Catabrosella	2	3	100	100
Crocus	2	3	100	100
Crossandra	2	3	100	100
Cyrtidiorchis	2	3	100	100
Datisca	2	3	100	100
Elephantopus	2	3	100	100
Erysimum	2	3	100	100
Flemingia	2	3	100	100
Holcoglossum	2	3	100	100
Huntleya	2	3	100	100
Leptinella	2	3	100	100
Liabum	2	3	100	100
Liriope	2	3	100	100
Lloydia	2	3	100	100
Lyperia	2	3	100	100
Mesospinidium	2	3	100	100
Nesoluma	2	3	100	100
Ostericum	2	3	100	100
Phippsia	2	3	100	100
Psychopsis	2	3	100	100
Rotheca	2	3	100	100
Scutellaria	2	3	100	100
Solenidium	2	3	100	100
Toona	2	3	100	100
Warmingia	2	3	100	100
Cyamopsis	2	4	100	100
Erato	2	4	100	100
Ochrocarpos	2	4	100	100
Phytolacca	2	4	100	100
Schizolobium	2	4	100	100
Sophora	2	4	100	100
Tovomita	2	4	100	100
Vitekorchis	2	4	100	100
Corydalis	2	5	100	100
Dipteronia	2	5	100	100
Gymnocladus	2	5	100	100
Momordica	2	5	100	100
Aquilaria	2	6	100	100
Dischidia	2	6	100	100
Kengyilia	2	6	100	100
Paeonia	2	7	100	100
Malope	2	8	100	100
Sibiraea	2	10	0	0
Nelumbo	2	11	100	100
Dimocarpus	2	16	100	100
Echinacea	3	3	0	0
Margaritaria	3	3	33.3333	33.3333
Greenovia	3	3	66.6667	66.6667
Ada	3	3	100	100
Adenophora	3	3	100	100
Agastache	3	3	100	100
Alternanthera	3	3	100	100
Anthoxanthum	3	3	100	100
Arctopus	3	3	100	100
Arcytophyllum	3	3	100	100
Arthrophyllum	3	3	100	100
Astragalus	3	3	100	100
Basananthe	3	3	100	100
Bethencourtia	3	3	100	100
Buddleja	3	3	100	100
Calamagrostis	3	3	100	100
Calamus	3	3	100	100
Carlowrightia	3	3	100	100
Cephalanthera	3	3	100	100
Chenopodium	3	3	100	100
Chersodoma	3	3	100	100
Coelospermum	3	3	100	100
Cordylanthus	3	3	100	100
Daniellia	3	3	100	100
Dasyphyllum	3	3	100	100
Dendropanax	3	3	100	100
Dendrophorbium	3	3	100	100
Dianthus	3	3	100	100
Dichelachne	3	3	100	100
Elekmania	3	3	100	100
Flueggea	3	3	100	100
Gymnosiphon	3	3	100	100
Haastia	3	3	100	100
Hemigraphis	3	3	100	100
Henriettea	3	3	100	100
Hierochloe	3	3	100	100
Hygrophila	3	3	100	100
Julbernardia	3	3	100	100
Khaya	3	3	100	100
Kingiodendron	3	3	100	100
Knoxia	3	3	100	100
Lagenophora	3	3	100	100
Lilium	3	3	100	100
Macradenia	3	3	100	100
Malesherbia	3	3	100	100
Micropholis	3	3	100	100
Mimulopsis	3	3	100	100
Neuwiedia	3	3	100	100
Othonna	3	3	100	100
Otomeria	3	3	100	100
Parapentas	3	3	100	100
Pentacalia	3	3	100	100
Pericallis	3	3	100	100
Persicaria	3	3	100	100
Pradosia	3	3	100	100
Promenaea	3	3	100	100
Richardia	3	3	100	100
Sagittaria	3	3	100	100
Schotia	3	3	100	100
Sclerolaena	3	3	100	100
Sinocrassula	3	3	100	100
Siphonochilus	3	3	100	100
Sobralia	3	3	100	100
Stellaria	3	3	100	100
Stenandrium	3	3	100	100
Stenosiphonium	3	3	100	100
Stenotyla	3	3	100	100
Streblus	3	3	100	100
Tibouchina	3	3	100	100
Triphysaria	3	3	100	100
Umbilicus	3	3	100	100
Warneckea	3	3	100	100
Zaluzianskya	3	3	100	100
Ligusticum	3	4	25	25
Corokia	3	4	75	75
Aspasia	3	4	100	100
Aster	3	4	100	100
Conostomium	3	4	100	100
Miltonia	3	4	100	100
Xylobium	3	4	100	100
Arctopoa	3	5	100	100
Centipeda	3	5	100	100
Erycina	3	5	100	100
Phylica	3	5	100	100
Alberta	3	6	100	100
Hypericum	3	6	100	100
Myrica	3	6	100	100
Melampyrum	3	7	100	100
Clarkia	3	8	100	100
Ionopsis	3	8	100	100
Littorella	3	9	100	100
Microtis	3	15	100	100
Vigna	3	16	100	100
Convolvulus	3	44	100	100
Cyrtochiloides	4	4	50	50
Forstera	4	4	50	50
Hebenstretia	4	4	50	50
Aciphylla	4	4	75	75
Atractylodes	4	4	75	75
Festuca	4	4	75	75
Kochia	4	4	75	75
Aichryson	4	4	100	100
Brassia	4	4	100	100
Chrysochlamys	4	4	100	100
Cleistanthus	4	4	100	100
Curcuma	4	4	100	100
Dalea	4	4	100	100
Denhamia	4	4	100	100
Disperis	4	4	100	100
Dunalia	4	4	100	100
Fimbristylis	4	4	100	100
Globba	4	4	100	100
Glochidion	4	4	100	100
Goodenia	4	4	100	100
Hibiscus	4	4	100	100
Ligularia	4	4	100	100
Macroclinium	4	4	100	100
Maytenus	4	4	100	100
Mutisia	4	4	100	100
Myrmecophila	4	4	100	100
Najas	4	4	100	100
Orthocarpus	4	4	100	100
Pennantia	4	4	100	100
Perezia	4	4	100	100
Phyllachne	4	4	100	100
Picris	4	4	100	100
Pittosporum	4	4	100	100
Polygala	4	4	100	100
Shortia	4	4	100	100
Stylidium	4	4	100	100
Tagetes	4	4	100	100
Trisetum	4	4	100	100
Vaughania	4	4	100	100
Veronicastrum	4	4	100	100
Vicia	4	4	100	100
Zingiber	4	4	100	100
Epipactis	4	5	40	40
Deyeuxia	4	5	80	80
Crotalaria	4	5	100	100
Emilia	4	5	100	100
Iranecio	4	5	100	100
Miltoniopsis	4	5	100	100
Muehlenbeckia	4	5	100	100
Triainolepis	4	5	100	100
Tulipa	4	5	100	100
Vanda	4	5	100	100
Pityphyllum	4	6	100	100
Cuitlauzina	4	7	100	100
Tetraberlinia	4	7	100	100
Trichosanthes	4	8	75	75
Calystegia	4	8	100	100
Corynocarpus	4	8	100	100
Lachenalia	4	10	100	100
Cardamine	4	13	100	100
Platanthera	4	17	100	100
Chromolaena	4	47	100	100
Platanus	4	82	100	100
Alisma	5	5	60	60
Benzingia	5	5	100	100
Bupleurum	5	5	100	100
Bursera	5	5	100	100
Calathea	5	5	100	100
Celmisia	5	5	100	100
Cynanchum	5	5	100	100
Deschampsia	5	5	100	100
Echeveria	5	5	100	100
Eleocharis	5	5	100	100
Graffenrieda	5	5	100	100
Hedyotis	5	5	100	100
Jarava	5	5	100	100
Lotononis	5	5	100	100
Melicytus	5	5	100	100
Nitraria	5	5	100	100
Notylia	5	5	100	100
Oxystigma	5	5	100	100
Phedimus	5	5	100	100
Pichonia	5	5	100	100
Pseudoselago	5	5	100	100
Selinocarpus	5	5	100	100
Sinclairia	5	5	100	100
Aphanocalyx	5	6	100	100
Baumea	5	6	100	100
Medicago	5	6	100	100
Trichopilia	5	6	100	100
Mormolyca	5	7	71.4286	71.4286
Euryops	5	7	100	100
Synthyris	5	7	100	100
Atocion	5	10	60	60
Myriophyllum	5	10	100	100
Besseya	5	12	100	100
Cryptocentrum	5	12	100	100
Hydrangea	5	19	89.4737	89.4737
Monticalia	6	6	66.6667	66.6667
Griselinia	6	6	100	100
Nicoraepoa	6	6	100	100
Philodendron	6	6	100	100
Psilanthus	6	6	100	100
Sindora	6	6	100	100
Bassia	6	7	100	100
Chuquiraga	6	7	100	100
Impatiens	6	7	100	100
Jacquemontia	6	7	100	100
Papaver	6	7	100	100
Searsia	6	7	100	100
Abronia	6	8	37.5	37.5
Phragmipedium	6	11	100	100
Trigonidium	6	16	100	100
Cynara	6	17	64.7059	64.7059
Hedychium	7	7	71.4286	71.4286
Acleisanthes	7	7	100	100
Elleanthus	7	7	100	100
Meriania	7	7	100	100
Metagentiana	7	7	100	100
Psychotria	7	7	100	100
Saussurea	7	7	100	100
Tetratheca	7	7	100	100
Thompsonella	7	7	100	100
Malaxis	7	8	62.5	62.5
Pimelea	7	8	100	100
Briza	7	9	100	100
Leochilus	7	9	100	100
Nymphoides	7	10	100	100
Acorus	7	11	100	100
Podostemum	7	11	100	100
Heterotaxis	7	14	100	100
Vallisneria	7	19	89.4737	89.4737
Mercurialis	7	28	78.5714	78.5714
Breynia	8	8	75	75
Carphalea	8	8	100	100
Gingidia	8	8	100	100
Crassula	8	9	100	100
Sutera	8	9	100	100
Geranium	8	11	100	100
Spartina	8	12	100	100
Primula	8	13	100	100
Pistacia	8	15	100	100
Aphelandra	9	9	100	100
Desmodium	9	9	100	100
Junellia	9	9	100	100
Kohautia	9	9	100	100
Schefflera	9	9	100	100
Sideritis	9	9	100	100
Meryta	9	10	100	100
Spermacoce	9	11	100	100
Bikinia	9	14	100	100
Acaena	9	23	100	100
Lepidium	9	107	85.9813	85.9813
Anisophyllea	10	10	80	80
Jacobaea	10	10	100	100
Oenothera	10	10	100	100
Zeugites	10	10	100	100
Brassaiopsis	10	11	100	100
Chrysophyllum	10	11	100	100
Pentanisia	10	11	100	100
Lockhartia	10	12	100	100
Swertia	10	13	84.6154	84.6154
Panax	10	19	100	100
Otiophora	11	12	83.3333	83.3333
Isolepis	11	13	100	100
Munnozia	11	14	100	100
Stewartia	11	15	66.6667	66.6667
Morella	11	17	52.9412	52.9412
Sabal	11	23	100	100
Fallopia	11	32	100	100
Conostegia	12	12	75	75
Burmannia	12	14	100	100
Cleistes	12	15	100	100
Liparis	12	20	75	75
Lavatera	12	25	92	92
Atriplex	12	39	87.1795	87.1795
Krameria	12	53	100	100
Aralia	13	14	100	100
Phalaenopsis	13	15	100	100
Diospyros	13	17	100	100
Passiflora	14	14	85.7143	85.7143
Lathyrus	14	14	100	100
Lobelia	14	14	100	100
Clerodendrum	14	15	100	100
Musa	14	15	100	100
Agalinis	14	26	100	100
Clethra	15	15	100	100
Brachyglottis	15	17	100	100
Acridocarpus	15	41	100	100
Dendrobium	16	16	100	100
Verbena	17	18	94.4444	94.4444
Bridelia	17	29	100	100
Oldenlandia	18	23	100	100
Potamogeton	18	54	88.8889	88.8889
Aglaia	19	28	100	100
Morinda	20	24	100	100
Selago	21	22	95.4545	95.4545
Swartzia	22	30	100	100
Pentas	25	26	92.3077	92.3077
Mallotus	29	33	100	100
Cliffortia	30	33	93.9394	93.9394
Potentilla	31	32	87.5	87.5
Sauropus	31	37	100	100
Scaphyglottis	34	41	100	100
Begonia	41	70	98.5714	98.5714
Phyllanthus	63	80	97.5	97.5
Stevia	71	91	79.1209	76.9231
Sideroxylon	42	42	95.2381	92.8571
Hypochaeris	16	39	84.6154	82.0513
Adenia	37	39	100	97.4359
Rosa	15	35	85.7143	82.8571
Phaseolus	4	68	100	97.0588
Kalanchoe	49	67	100	97.0149
Pilea	63	66	100	96.9697
Indigofera	52	63	100	96.8254
Aponogeton	16	31	90.3226	87.0968
Leontodon	22	31	87.0968	83.871
Veronica	128	149	97.9866	94.6309
Silene	20	28	96.4286	92.8571
Rhus	21	28	92.8571	89.2857
Acer	55	326	97.2393	93.5583
Opuntia	8	27	11.1111	7.40741
Corchorus	16	20	80	75
Hylotelephium	19	20	90	85
Nassella	19	19	100	94.7368
Fritillaria	38	38	86.8421	81.5789
Dichaea	33	54	88.8889	83.3333
Tiquilia	26	302	99.0066	93.3775
Ficus	146	151	91.3907	85.4305
Sporobolus	9	16	56.25	50
Nepeta	31	31	100	93.5484
Oreobolus	13	15	60	53.3333
Strobilanthes	29	29	100	93.1034
Boehmeria	3	14	100	92.8571
Diuris	6	14	42.8571	35.7143
Kniphofia	53	96	23.9583	16.6667
Melampodium	39	93	100	92.4731
Garcinia	43	92	97.8261	90.2174
Caucaea	9	13	61.5385	53.8462
Salvia	62	124	98.3871	90.3226
Zea	2	12	58.3333	50
Rhodiola	20	47	95.7447	87.234
Tolumnia	21	23	78.2609	69.5652
Euphrasia	10	156	49.359	40.3846
Senecio	76	89	92.1348	83.1461
Rhododendron	6	11	90.9091	81.8182
Gymnosporia	9	11	100	90.9091
Piptochaetium	11	11	100	90.9091
Hoya	31	76	98.6842	89.4737
Mammillaria	15	32	100	90.625
Castilleja	21	21	90.4762	80.9524
Clusia	26	63	96.8254	87.3016
Cyrtochilum	31	41	78.0488	68.2927
Hebe	6	10	40	30
Rondeletia	9	10	90	80
Bryonia	10	60	98.3333	88.3333
Gunnera	20	20	100	90
Malva	17	49	95.9184	85.7143
Glandularia	11	19	89.4737	78.9474
Sedum	54	56	100	89.2857
Dionysia	35	37	100	89.1892
Macaranga	37	37	94.5946	83.7838
Psathyrostachys	1	9	100	88.8889
Solanum	6	9	88.8889	77.7778
Oncidium	75	89	91.0112	79.7753
Oxalis	167	177	93.2203	81.9209
Cuscuta	44	69	97.1014	85.5072
Masdevallia	34	34	94.1176	82.3529
Trichocentrum	16	17	88.2353	76.4706
Coprosma	6	8	50	37.5
Angelica	7	8	100	87.5
Aeonium	8	8	62.5	50
Panicum	31	39	84.6154	71.7949
Dioscorea	6	62	56.4516	43.5484
Maxillaria	246	476	77.7311	64.4958
Kadua	15	15	86.6667	73.3333
Carex	73	80	90	76.25
Ourisia	18	29	100	86.2069
Gomesa	43	50	66	52
Chiloglottis	14	14	57.1429	42.8571
Debregeasia	3	14	100	85.7143
Polygonum	5	7	100	85.7143
Bomarea	7	7	100	85.7143
Chorizanthe	8	56	64.2857	50
Pachyanthus	14	14	64.2857	50
Carapa	14	14	100	85.7143
Rodriguezia	7	7	42.8571	28.5714
Grandiphyllum	5	7	85.7143	71.4286
Eleutherococcus	11	21	76.1905	61.9048
Scaevola	42	48	89.5833	75
Vanilla	4	41	90.2439	75.6098
Muraltia	67	67	79.1045	64.1791
Dupontia	1	40	100	85
Oryza	7	13	100	84.6154
Miconia	165	173	80.3468	64.7399
Calceolaria	64	64	96.875	81.25
Pseudopanax	17	19	94.7368	78.9474
Viola	11	63	77.7778	61.9048
Leymus	13	68	100	83.8235
Paphiopedilum	41	55	83.6364	67.2727
Ruellia	98	116	95.6897	79.3103
Rafnia	12	12	100	83.3333
Alseuosmia	4	6	16.6667	0
Prunus	17	23	91.3043	73.913
Gagea	71	136	82.3529	64.7059
Schoenus	10	11	100	81.8182
Ossaea	11	11	100	81.8182
Plantago	68	88	89.7727	71.5909
Morus	9	11	36.3636	18.1818
Cedrela	9	16	100	81.25
Alcea	19	21	38.0952	19.0476
Trifolium	222	257	81.7121	62.6459
Poa	46	56	89.2857	69.6429
Pseudoroegneria	4	5	100	80
Rubus	4	10	60	40
Galeottia	5	5	100	80
Olearia	9	10	100	80
Villadia	10	10	100	80
Secale	11	15	53.3333	33.3333
Hieracium	11	20	85	65
Lebeckia	15	15	100	80
Clidemia	39	40	100	80
Caragana	28	39	61.5385	41.0256
Gleditsia	11	58	96.5517	75.8621
Coffea	79	106	91.5094	70.7547
Althaea	6	19	94.7368	73.6842
Gentianella	13	14	85.7143	64.2857
Taraxacum	27	215	95.3488	73.4884
Croton	45	45	97.7778	75.5556
Pachycladon	10	27	77.7778	55.5556
Crinum	27	27	77.7778	55.5556
Otoglossum	6	9	100	77.7778
Aspalathus	9	9	100	77.7778
Pouteria	24	27	100	77.7778
Tetrazygia	9	9	55.5556	33.3333
Elymus	35	98	90.8163	68.3673
Macrocarpaea	44	79	82.2785	59.4937
Mirabilis	10	17	82.3529	58.8235
Abrotanella	19	21	100	76.1905
Salix	25	33	66.6667	42.4242
Thymus	3	4	50	25
Aragoa	4	4	50	25
Graphistylis	4	4	50	25
Wiborgia	6	8	100	75
Chondroscaphe	7	8	75	50
Lotus	11	12	83.3333	58.3333
Nicotiana	31	43	95.3488	69.7674
Aerides	16	27	100	74.0741
Draba	122	273	53.1136	27.1062
Cineraria	20	23	86.9565	60.8696
Lens	6	15	100	73.3333
Zelkova	5	41	90.2439	63.4146
Ajania	11	11	63.6364	36.3636
Manulea	11	11	100	72.7273
Disa	18	18	94.4444	66.6667
Villarsia	12	18	100	72.2222
Codonopsis	4	7	57.1429	28.5714
Iris	6	7	100	71.4286
Planchonella	37	42	85.7143	57.1429
Iochroma	17	17	100	70.5882
Krascheninnikovia	5	10	80	50
Costus	48	75	86.6667	56
Leandra	26	26	76.9231	46.1538
Artemisia	12	16	100	68.75
Pescatoria	5	6	50	16.6667
Acnistus	1	3	100	66.6667
Foeniculum	1	3	100	66.6667
Hordeum	3	3	100	66.6667
Pleioblastus	3	3	100	66.6667
Boerhavia	5	6	100	66.6667
Kefersteinia	6	6	83.3333	50
Lachnagrostis	6	6	83.3333	50
Calycogonium	9	9	100	66.6667
Niemeyera	9	9	100	66.6667
Osteospermum	9	9	100	66.6667
Dendrocalamus	3	3	66.6667	33.3333
Rytidosperma	3	3	66.6667	33.3333
Disterigma	20	24	91.6667	58.3333
Heliotropium	19	29	68.9655	34.4828
Epimedium	20	23	56.5217	21.7391
Avena	10	11	72.7273	36.3636
Chrysanthemum	18	19	68.4211	31.5789
Beccariella	8	8	100	62.5
Ilex	8	8	100	62.5
Hoheria	7	21	42.8571	4.7619
Pycnandra	12	13	100	61.5385
Mollugo	2	5	80	40
Ochrothallus	4	5	100	60
Zingeria	5	20	90	50
Tococa	18	18	100	55.5556
Luzula	28	29	100	55.1724
Dyschoriste	8	13	100	53.8462
Cyperus	2	4	50	0
Chaubardiella	4	4	100	50
Cymbidium	4	4	100	50
Gahnia	4	4	100	50
Limosella	4	4	100	50
Microlaena	4	4	100	50
Stenia	4	6	100	50
Agrostis	8	8	62.5	12.5
Orostachys	8	8	100	50
Warczewiczella	5	6	83.3333	33.3333
Bambusa	5	5	100	40
Leptostylis	5	5	100	40
Helleborus	14	16	100	37.5
Trevesia	7	11	100	36.3636
Arctophila	1	3	100	33.3333
Boechera	2	3	100	33.3333
Blakea	3	3	100	33.3333
Capsella	3	3	100	33.3333
Evolvulus	3	3	100	33.3333
Gynoxys	3	3	100	33.3333
Phaulopsis	3	3	100	33.3333
Tanacetum	3	3	100	33.3333
Myrsine	6	6	100	33.3333
